# Supplementary material
Source: publisher figshare collection journal article supplement (https://acs.figshare.com/ndownloader/files/14370587)

# Supporting Information

## Synthesis of Dibenzophospholes by $\text{Ti}_2\text{O}$ -Mediated Intramolecular Phospha-Friedel-Crafts-Type Reaction

Kazutoshi Nishimura, Koji Hirano,\* and Masahiro Miura\*

*Department of Applied Chemistry, Graduate School of Engineering, Osaka University, Suita, Osaka  
565-0871, Japan*

### Contents

|                                               |         |
|-----------------------------------------------|---------|
| <b>Instrumentation and Chemicals</b>          | S1      |
| <b>Experimental Procedures</b>                | S2–S3   |
| <b>X-Ray Analysis</b>                         | S4–S5   |
| <b>NMR Studies for Mechanistic Discussion</b> | S6–S10  |
| <b>Characterization Data for Products</b>     | S11–S52 |

### Instrumentation and Chemicals

$^1\text{H}$ ,  $^{13}\text{C}\{^1\text{H}\}$ ,  $^{19}\text{F}\{^1\text{H}\}$ , and  $^{31}\text{P}\{^1\text{H}\}$  NMR spectra were recorded at 400 MHz, 100 MHz, 162 MHz, and 162 MHz, respectively, for  $\text{CDCl}_3$  and toluene- $d_6$  solutions. HRMS data were obtained by APCI using TOF or EI using a double focusing mass spectrometer. GC analysis was carried out using a silicon OV-17 column (i. d. 2.6 mm x 1.5 m) or a CBP-1 capillary column (i. d. 0.5 mm x 25 m). TLC analyses were performed on commercial glass plates bearing a 0.25 mm layer of Merck silica gel 60F<sub>254</sub>. Silica gel (Wakosil C-200) was used for column chromatography. Gel permeation chromatography (GPC) was performed by LC-6AD (pump, SHIMADZU, 3.5 mL/min  $\text{CHCl}_3$ ) and SPD-20A (UV detector, SHIMADZU, 254 nm) with two in-line GPC H-2001 (20 x 500 mm, particle size: 15  $\mu\text{m}$ ) and H-2002 columns (20 x 500 mm, particle size: 15  $\mu\text{m}$ ) (preparative columns, Shodex,  $\text{CHCl}_3$  eluent). Unless otherwise noted, materials obtained from commercial suppliers were used without further purification. Toluene was dried on a Glass Contour Solvent dispensing system (Nikko Hansen & Co., Ltd.) prior to use. All secondary phosphine oxides **1** were synthesized from the corresponding aryl bromides and  $\text{PhPCl}_2$  according to the literature method.<sup>1</sup> All reactions were carried out under nitrogen atmosphere.

<sup>1</sup> Kuninobu, Y.; Yoshida, T.; Takai, K. *J. Org. Chem.* **2011**, 76, 7370.

## Experimental Procedures

Synthesis of **2a** (Table 1, entry 7, 0.10 mmol scale): In a Schlenk tube with pressure resistance, [1,1'-biphenyl]-2-yl(phenyl)phosphine oxide (**1a**, 0.10 mmol, 28 mg) was placed with a magnetic stir bar under N<sub>2</sub>. Toluene (1.5 mL) was subsequently added by a syringe. The resulting mixture was stirred until it became homogeneous solution. Tf<sub>2</sub>O (0.12 mmol, 20  $\mu$ l) was then added by a syringe. The reaction mixture was heated at 90 °C in an oil bath for 8 h. After cooling, sat. NaHCO<sub>3</sub> aq was added. The resulting mixture was extracted three times with ethyl acetate (20 mL x 3). The combined organic layer was dried over Na<sub>2</sub>SO<sub>4</sub> and concentrated in vacuo. The desired product 5-phenylbenzo[b]phosphindole 5-oxide (**2a**, 25 mg, 90%) was isolated by column chromatography on silica gel using ethyl acetate as eluent.

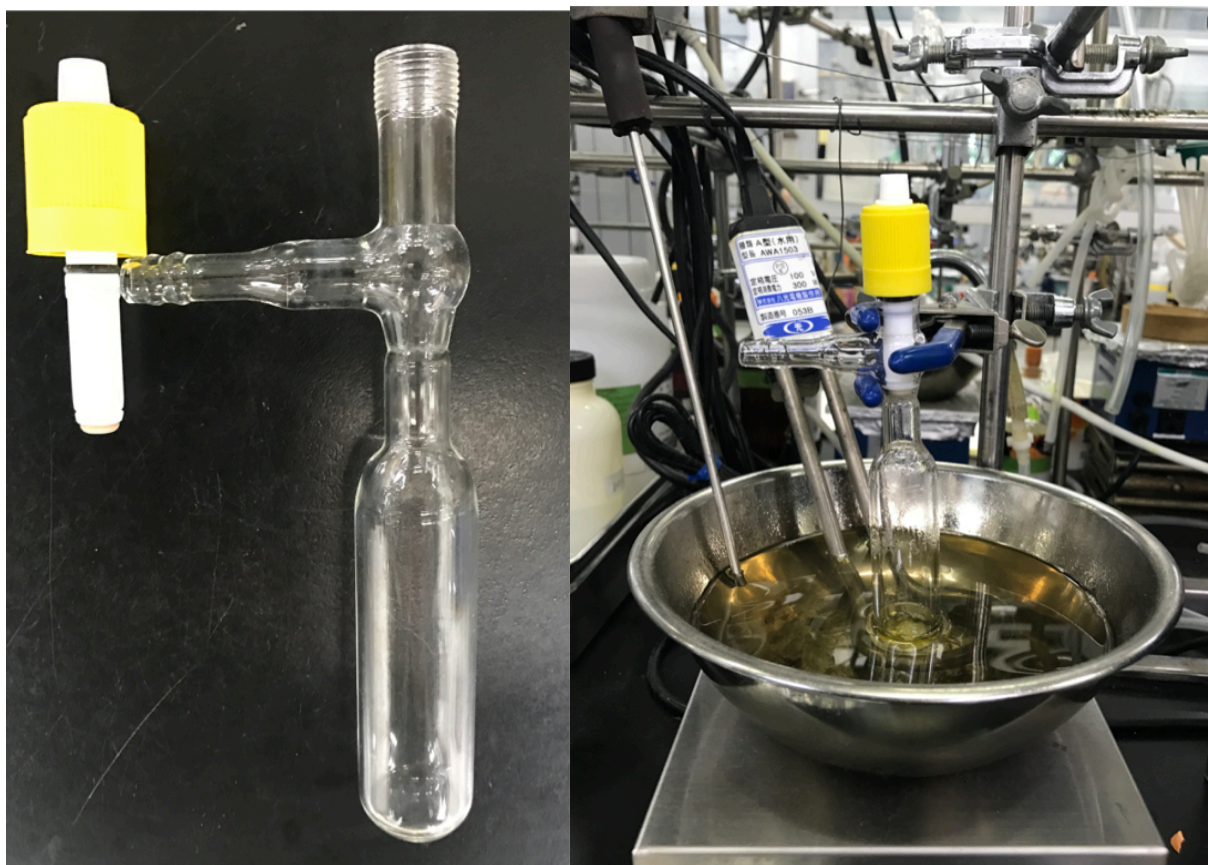

**Figure S1.** Photos of Schlenk flask used in this study: reaction set up (left); reaction progress (right).

Synthesis of **2a** (Table 1, entry 7, 1.0 mmol scale): In a Schlenk tube with pressure resistance, [1,1'-biphenyl]-2-yl(phenyl)phosphine oxide (**1a**, 1.0 mmol, 278 mg) was placed with a magnetic stir bar under N<sub>2</sub>. Toluene (15 mL) was subsequently added by a syringe. The resulting mixture was

stirred until it became homogeneous solution.  $\text{Ti}_2\text{O}$  (1.2 mmol, 200  $\mu\text{l}$ ) was then added by a syringe. The reaction mixture was heated at 90  $^\circ\text{C}$  in an oil bath for 8 h. After cooling, sat.  $\text{NaHCO}_3$  aq was added. The resulting mixture was extracted three times with ethyl acetate (20 mL x 3). The combined organic layer was dried over  $\text{Na}_2\text{SO}_4$  and concentrated in vacuo. The desired product 5-phenylbenzo[b]phosphindole 5-oxide (**2a**, 183 mg, 66%) was isolated by column chromatography on silica gel using ethyl acetate as eluent.

Synthesis of **2r** (Scheme 5): In a Schlenk tube with pressure resistance, (thiophene-2,5-diylbis(2,1-phenylene))bis(phenylphosphine oxide) (**1r**, 0.10 mmol, 48 mg) was placed with a magnetic stir bar under  $\text{N}_2$ . Toluene (1.5 mL) was subsequently added by a syringe. The resulting mixture was stirred until it became homogeneous solution.  $\text{Ti}_2\text{O}$  (0.24 mmol, 40  $\mu\text{l}$ ) was then added by a syringe. The reaction mixture was heated at 90  $^\circ\text{C}$  in an oil bath for 24 h. After cooling, sat.  $\text{NaHCO}_3$  aq was added. The resulting mixture was extracted eight times with chloroform (20 mL x 8). The combined organic layer was dried over  $\text{Na}_2\text{SO}_4$  and concentrated in vacuo. The desired product 5,6-diphenyldiphosphindolo[3,2-b:2',3'-d]thiophene 5,6-dioxide (**2r**, 32 mg, 67% with ca. 1:1 *syn/anti* ratio) was isolated by column chromatography on silica gel using chloroform-methanol (10:1) as eluent.

## X-Ray Analysis

The X-ray quality crystals of **2n** were grown from CH<sub>2</sub>Cl<sub>2</sub>/hexane.

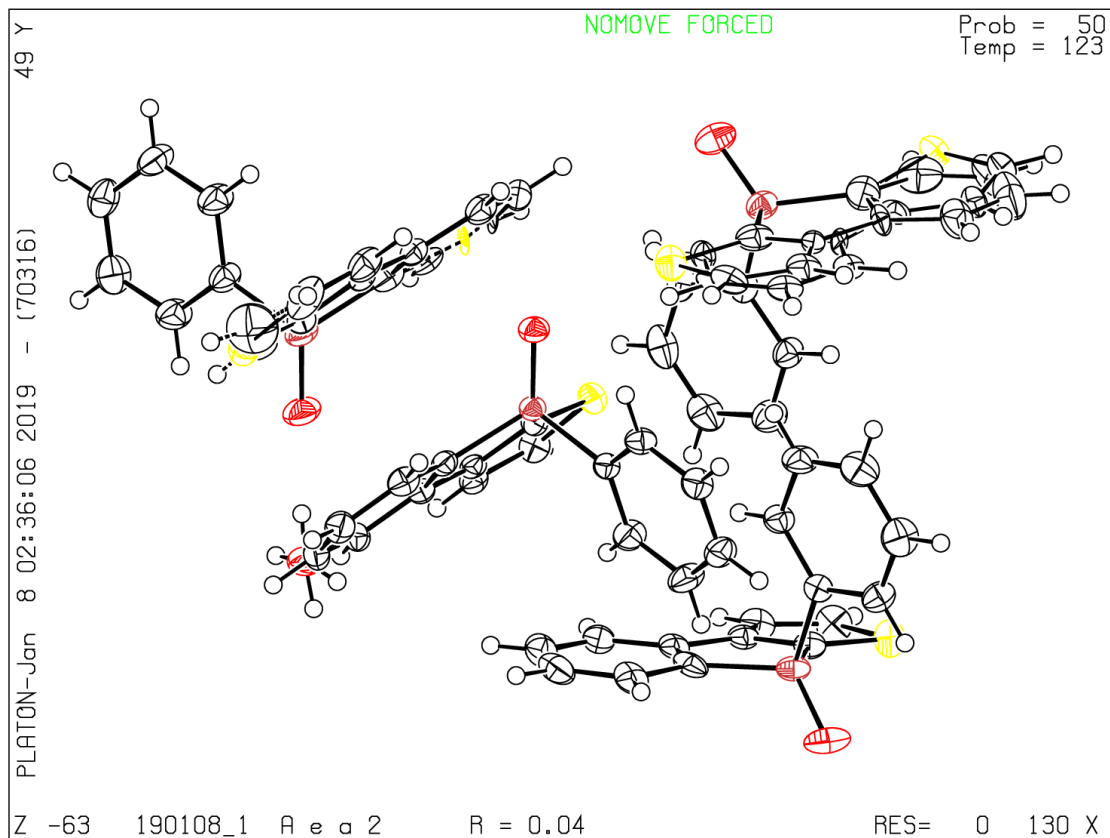

**Figure S2.** ORTEP drawing of **2n** (CCDC 1889358).

The X-ray quality crystals of *syn-2r* were grown from wet  $\text{CHCl}_3$ .

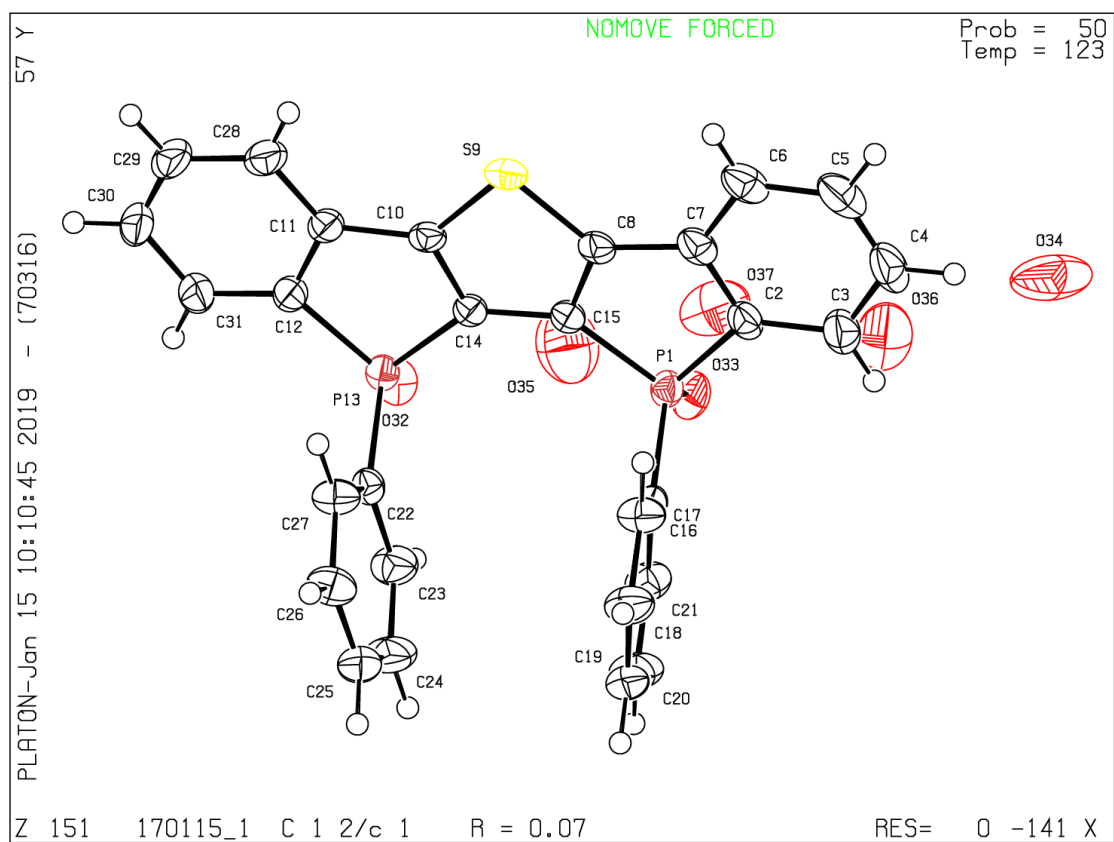

**Figure S3.** ORTEP drawing of *syn-2r* (CCDC 1891190).

## NMR Studies for Mechanistic Discussion

We monitored the reaction mixture of **1a** with Tf<sub>2</sub>O in toluene-*d*<sub>8</sub> by <sup>19</sup>F{<sup>1</sup>H}, <sup>31</sup>P, <sup>31</sup>P{<sup>1</sup>H}, and <sup>1</sup>H NMR (Figures S4–10). Upon treatment of **1a** with Tf<sub>2</sub>O at room temperature, an original signal of Tf<sub>2</sub>O (−72.5 ppm) still remained but a new signal appeared at −77.8 ppm (Figure S4). On the other hand, in the <sup>31</sup>P and <sup>31</sup>P{<sup>1</sup>H} NMR the original signal of **1a** (15.7 ppm) immediately disappeared, and somewhat complicated spectra were obtained (Figures S5 and S6). The most informative signal was observed around 37–40 ppm, which may be corresponding to P–H species: the observed large coupling constant (564 Hz) was consistent with the <sup>1</sup>J<sub>P-H</sub> coupling, and the <sup>1</sup>H-decoupled <sup>31</sup>P{<sup>1</sup>H} NMR showed the singlet signal (Figure S5) while the doublet signal was observed in the <sup>31</sup>P NMR (Figure S6). Additionally, <sup>1</sup>H NMR also suggested the presence of P–H bond (around 8.2 ppm signal, Figure S7). These outcomes support the presence of a five-coordinated, Tf<sub>2</sub>O adduct **A'** rather than our originally proposed phosphonium cation **A** (Scheme S1). After heating at 90 °C, there was no significant change in <sup>19</sup>F{<sup>1</sup>H} NMR (Figure S8), but in the <sup>31</sup>P{<sup>1</sup>H} NMR (Figure S9) the major signal was newly observed at 57.4 ppm (Figure S9), which was completely different from the signal of final product, dibenzophosphole oxide **2a** in toluene-*d*<sub>8</sub>/CDCl<sub>3</sub> (32.1 ppm; isolated **2a** was hardly soluble in pure toluene-*d*<sub>8</sub>). However, our control experiment using the isolated **2a** and TfOH showed a similar <sup>31</sup>P{<sup>1</sup>H} signal (59.8) in toluene-*d*<sub>8</sub>/CDCl<sub>3</sub> (Figure S10). Thus, the signal at 57.4 ppm in Figure S9 is assigned to be a complex of **2a** and TfOH.

On the basis of the above considerations, we propose the revised tentative reaction mechanism in Scheme S1b. The formed TfOH and CF<sub>3</sub>SO<sub>2</sub>H generally show similar signals to Tf<sub>2</sub>O, and thus some <sup>19</sup>F{<sup>1</sup>H} signals around −73 ppm are always observed during the course of reaction (Figures S4 and S8). However, the present NMR studies are still preliminary, and additional efforts are necessary for conclusive mechanistic statement.

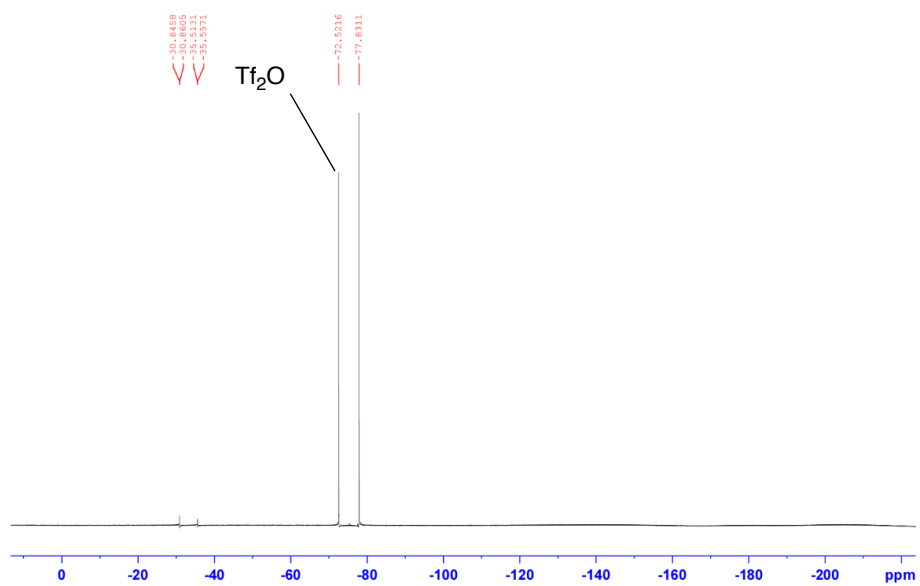

**Figure S4.**  $^{19}\text{F}\{^1\text{H}\}$  NMR of **1a** and  $\text{Tf}_2\text{O}$  in toluene- $d_8$  at rt for 10 min.

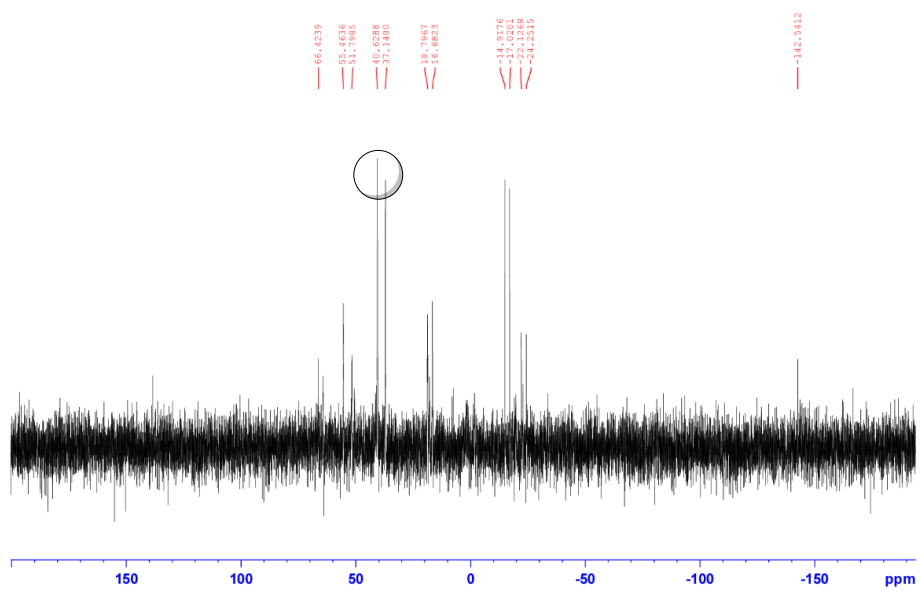

**Figure S5.**  $^{31}\text{P}$  NMR of **1a** and  $\text{Tf}_2\text{O}$  in toluene- $d_8$  at rt for 10 min.

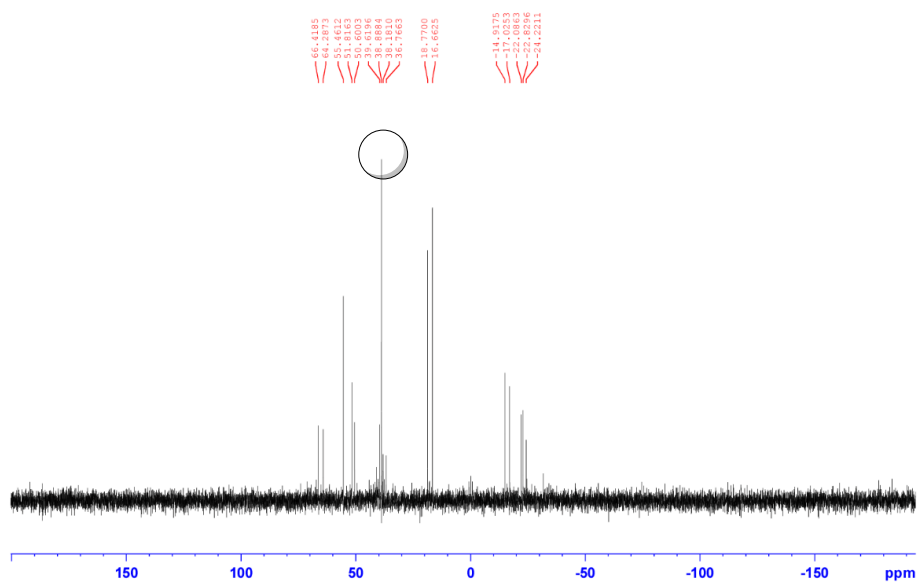

**Figure S6.**  $^{31}\text{P}\{^1\text{H}\}$  NMR of **1a** and  $\text{Tf}_2\text{O}$  in toluene- $d_8$  at rt for 10 min.

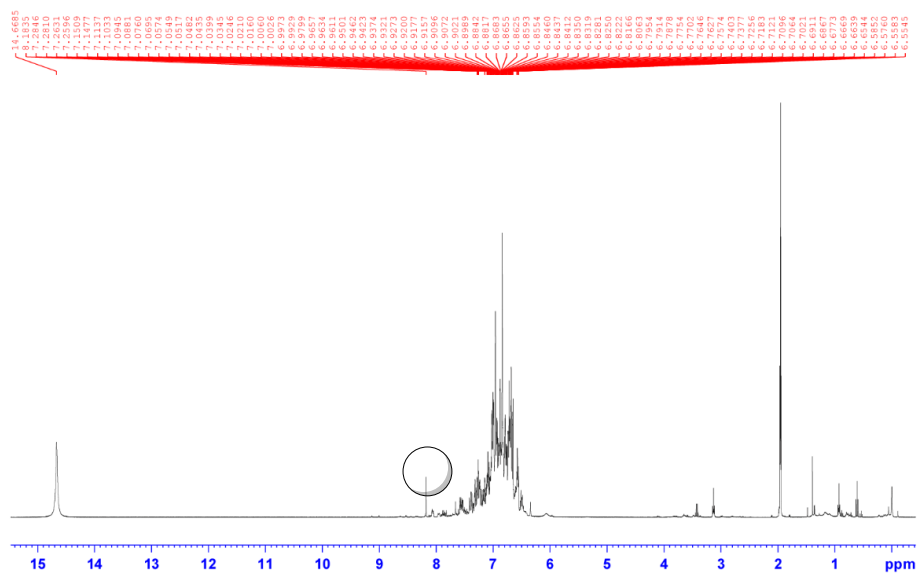

**Figure S7.**  $^1\text{H}$  NMR of **1a** and  $\text{Tf}_2\text{O}$  in toluene- $d_8$  at rt for 10 min.



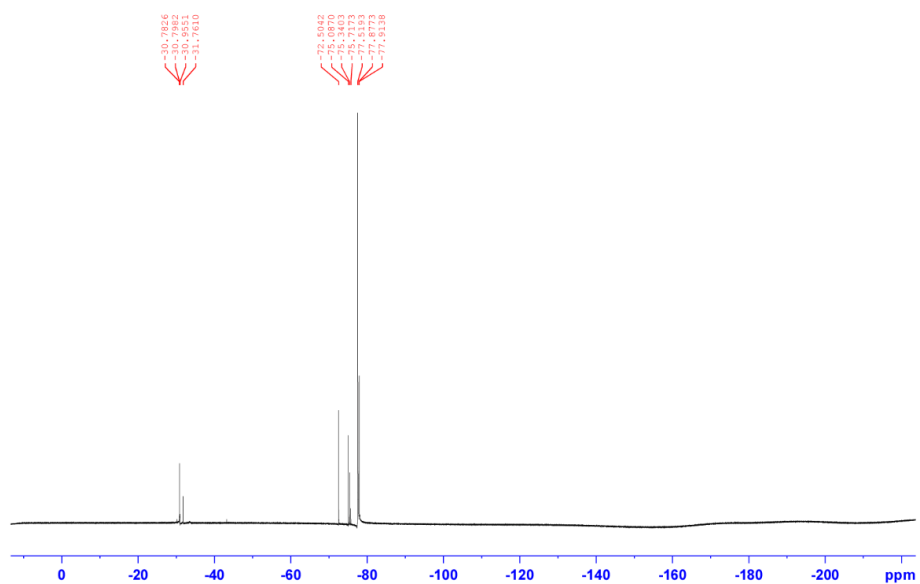

**Figure S8.**  $^{19}\text{F}\{^1\text{H}\}$  NMR of **1a** and  $\text{Tf}_2\text{O}$  in toluene- $d_8$  at 90 °C for 8 h.

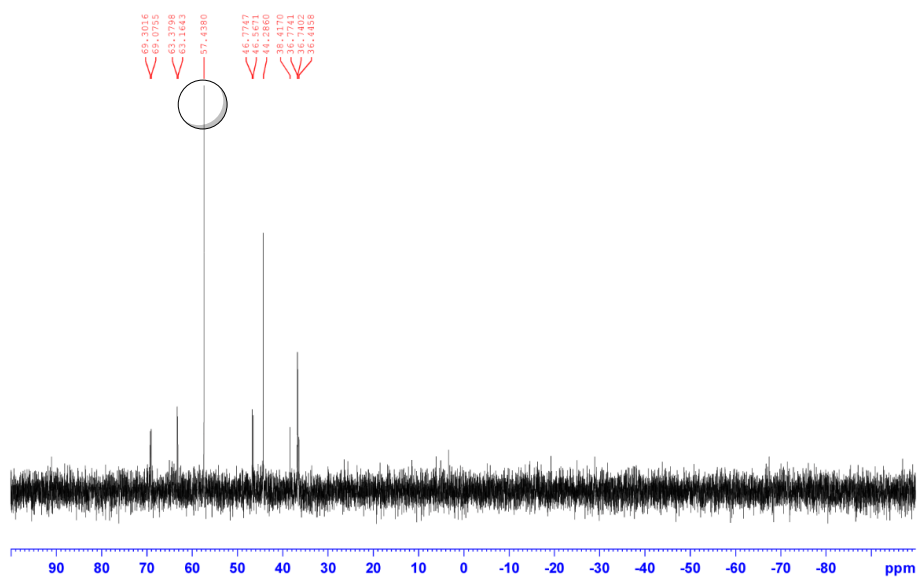

**Figure S9.**  $^{31}\text{P}\{^1\text{H}\}$  NMR of **1a** and  $\text{Tf}_2\text{O}$  in toluene- $d_8$  at 90 °C for 8 h.

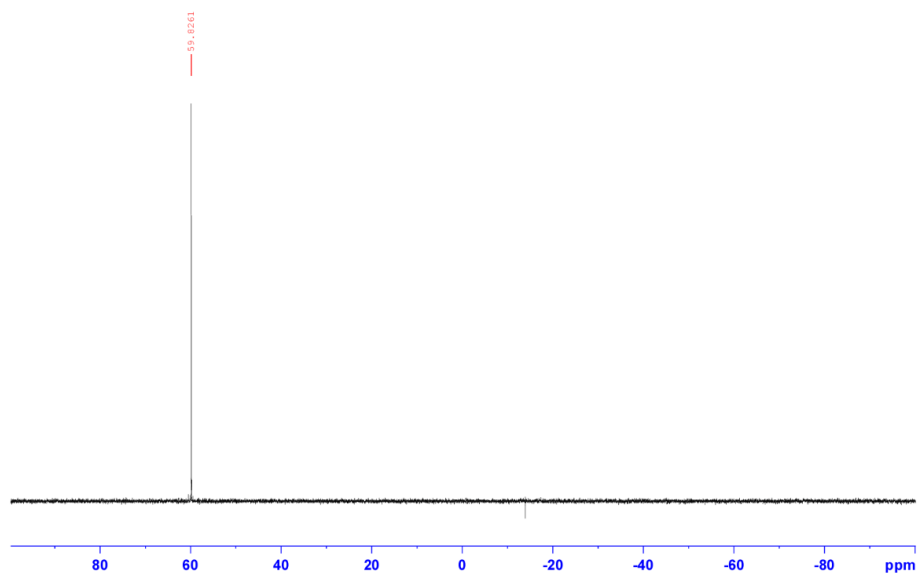

**Figure S10.**  $^{31}\text{P}\{^1\text{H}\}$  NMR of **2a** and  $\text{Tf}_2\text{O}$  in toluene- $d_8$  at rt for 30 min.

**Scheme S1.** Initial Working Hypothesis (a) and Revised Tentative Mechanism (b).

a) initial working hypothesis

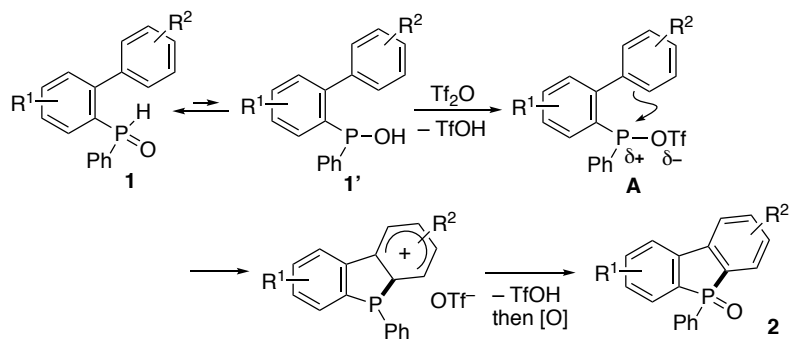

b) revised tentative mechanism

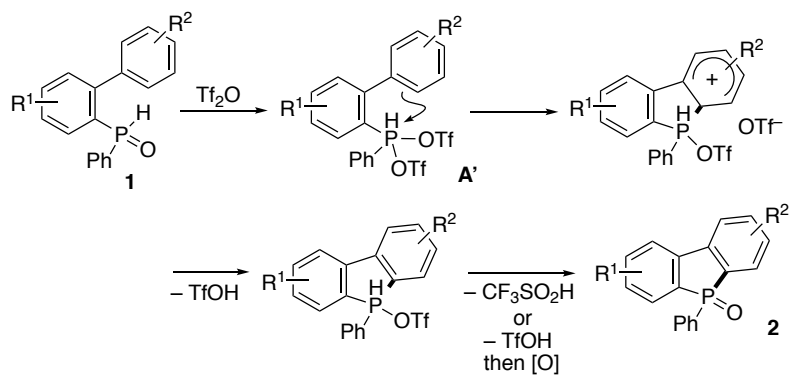

## Characterization Data for Products

$^1\text{H}$ ,  $^{13}\text{C}\{^1\text{H}\}$ , and  $^{31}\text{P}\{^1\text{H}\}$  NMR spectra for all compounds are attached in the last part.

The products **2a**, **2d**, **2e**, **2f**, **2g**, **2k**, **2l**, and **2n** are known, and their spectra data were in agreement with the reported values.<sup>1,2</sup>

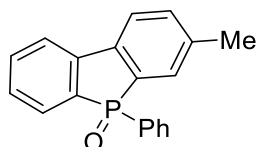

**3-Methyl-5-phenylbenzo[*b*]phosphindole 5-oxide (2b)**: 22 mg (75%); white solid; m.p. 144-145 °C;  $^1\text{H}$  NMR (400 MHz,  $\text{CDCl}_3$ ):  $\delta$  2.36 (s, 3H), 7.32-7.42 (m, 4H), 7.47-7.58 (m, 3H), 7.63-7.72 (m, 4H), 7.56 (dd,  $J = 7.7, 2.9$ , 1H);  $^{13}\text{C}\{^1\text{H}\}$  NMR (100 MHz,  $\text{CDCl}_3$ ):  $\delta$  21.45 (1C), 121.01 (d,  $J = 10.2$  Hz, 1C), 121.17 (d,  $J = 10.8$  Hz, 1C), 128.84 (d,  $J = 12.5$  Hz, 2C), 129.12 (d,  $J = 11.0$  Hz, 1C), 129.99 (d,  $J = 9.5$  Hz, 1C), 130.48 (d,  $J = 9.6$  Hz, 1C), 131.17 (d,  $J = 102.3$  Hz, 1C), 131.19 (d,  $J = 10.9$  Hz, 2C), 132.23 (d,  $J = 2.9$  Hz, 1C), 132.87 (d,  $J = 106.4$  Hz, 1C), 133.10 (d,  $J = 105.9$  Hz, 1C), 133.46 (d,  $J = 2.1$  Hz, 1C), 134.26 (d,  $J = 2.1$  Hz, 1C), 139.32 (d,  $J = 21.7$  Hz, 1C), 139.87 (d,  $J = 11.3$  Hz, 1C), 142.14 (d,  $J = 21.6$  Hz, 1C);  $^{31}\text{P}\{^1\text{H}\}$  NMR (162 MHz,  $\text{CDCl}_3$ ):  $\delta$  33.68; HRMS ( $\text{EI}^+$ )  $m/z$  ( $\text{M}^+$ ) calcd for  $\text{C}_{19}\text{H}_{15}\text{OP}$ : 290.0861, found: 290.0860.

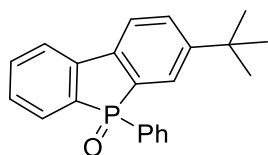

**3-(*tert*-Butyl)-5-phenylbenzo[*b*]phosphindole 5-oxide (2c)**: 22 mg (66%); white solid; m.p. 62-63 °C;  $^1\text{H}$  NMR (400 MHz,  $\text{CDCl}_3$ ):  $\delta$  1.31 (s, 9H), 7.34 (ddd,  $J = 7.2, 7.2, 3.6$  Hz, 1H), 7.40 (ddd,  $J = 7.3, 7.3, 3.0$  Hz, 2H), 7.50 (ddd,  $J = 7.3, 7.3, 1.4$  Hz, 1H), 7.56 (dd,  $J = 7.6, 7.6$ , 1H), 7.61-7.76 (m, 6H), 7.79 (dd,  $J = 2.9, 7.7$  Hz, 1H);  $^{13}\text{C}\{^1\text{H}\}$  NMR (100 MHz,  $\text{CDCl}_3$ ):  $\delta$  31.30 (3C), 35.22 (1C), 121.03 (d,  $J = 10.8$  Hz, 1C), 121.05 (d,  $J = 9.6$  Hz, 1C), 126.73 (d,  $J = 10.0$  Hz, 1C), 128.84 (d,  $J = 12.4$  Hz, 2C), 129.14 (d,  $J = 11.1$  Hz, 1C), 129.95 (d,  $J = 9.5$  Hz, 1C), 130.88 (d,  $J = 2.1$  Hz, 1C), 131.18 (d,  $J = 102.3$  Hz, 1C), 131.22 (d,  $J = 10.9$  Hz, 2C), 132.21 (d,  $J = 2.8$  Hz, 1C), 132.64 (d,  $J = 106.4$  Hz, 1C), 133.14 (d,  $J = 106.5$  Hz, 1C), 133.44 (d,  $J = 2.1$  Hz, 1C), 139.39 (d,  $J = 21.9$  Hz, 1C), 141.95 (d,  $J = 21.7$  Hz, 1C), 153.25 (d,  $J = 10.2$  Hz, 1C);  $^{31}\text{P}\{^1\text{H}\}$  NMR (162 MHz,  $\text{CDCl}_3$ ):  $\delta$  34.28; HRMS (APCI)

<sup>2</sup> Unoh, Y.; Satoh, T.; Hirano, K.; Miura, M. *ACS Catal.* **2015**, *5*, 6634.

$m/z$  ( $M+H$ )<sup>+</sup> calcd for C<sub>22</sub>H<sub>22</sub>OP: 333.1408, found: 333.1403.

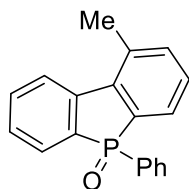

**1-Methyl-5-phenylbenzo[*b*]phosphindole 5-oxide (2h):** 21 mg (72%); white solid; m.p. 170-171 °C; <sup>1</sup>H NMR (400 MHz, CDCl<sub>3</sub>): δ 2.77 (s, 3H), 7.29 (ddd, *J* = 7.4, 7.4, 3.5 Hz, 1H), 7.36-7.40 (m, 4H), 7.46-7.50 (m, 1H), 7.58-7.67 (m, 4H), 7.76 (ddd, *J* = 10.5, 7.4, 0.7 Hz, 1H), 7.79 (dd, *J* = 8.0, 3.5 Hz, 1H); <sup>13</sup>C{<sup>1</sup>H} NMR (100 MHz, CDCl<sub>3</sub>): δ 23.06 (1C), 125.48 (d, *J* = 9.2 Hz, 1C), 127.91 (d, *J* = 9.6 Hz, 1C), 128.74 (d, *J* = 11.0 Hz, 1C), 128.80 (d, *J* = 12.5 Hz, 2C), 129.13 (d, *J* = 12.1 Hz, 1C), 130.28 (d, *J* = 9.4 Hz, 1C), 131.21 (d, *J* = 103.3 Hz, 1C), 131.23 (d, *J* = 10.8 Hz, 2C), 132.19 (d, *J* = 2.9 Hz, 1C), 133.42 (d, *J* = 2.2 Hz, 1C), 133.76 (d, *J* = 104.3 Hz, 1C), 133.96 (d, *J* = 106.0 Hz, 1C), 135.04 (d, *J* = 9.9 Hz, 1C), 136.98 (d, *J* = 2.1 Hz, 1C), 139.86 (d, *J* = 21.5 Hz, 1C), 143.240 (d, *J* = 21.6 Hz, 1C); <sup>31</sup>P{<sup>1</sup>H} NMR (162 MHz, CDCl<sub>3</sub>): δ 32.58; HRMS (EI<sup>+</sup>)  $m/z$  ( $M^+$ ) calcd for C<sub>19</sub>H<sub>15</sub>OP: 290.0861, found: 290.0864.

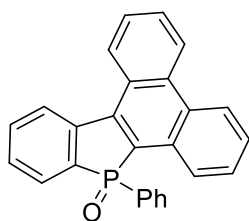

**9-Phenyltribenzo[*b,e,g*]phosphindole 9-oxide (2i):** 31 mg (83%); white solid; m.p. 192-193 °C; <sup>1</sup>H NMR (400 MHz, CDCl<sub>3</sub>): δ 7.33-7.38 (m, 2H), 7.43-7.47 (m, 2H), 7.54-7.58 (m, 1H), 7.63-7.70 (m, 2H), 7.72-7.86 (m, 5H), 8.30 (d, *J* = 8.0 Hz, 1H), 8.54 (dd, *J* = 8.0, 3.5 Hz, 1H), 8.68 (d, *J* = 8.4 Hz, 1H), 8.82-8.84 (m, 1H), 8.99-9.01 (m, 1H); <sup>13</sup>C{<sup>1</sup>H} NMR (100 MHz, CDCl<sub>3</sub>): δ 123.17 (1C), 124.22 (1C), 125.71 (d, *J* = 10.8 Hz, 1C), 125.95 (1C), 127.19 (d, *J* = 5.6 Hz, 1C), 127.55 (1C), 127.99 (1C), 128.15 (d, *J* = 11.8 Hz, 1C), 128.19 (1C), 128.70 (1C), 128.99 (d, *J* = 12.4 Hz, 2C), 129.05 (d, *J* = 11.1 Hz, 1C), 129.45 (d, *J* = 8.9 Hz, 1C), 130.26 (d, *J* = 9.9 Hz, 1C), 130.32 (d, *J* = 111.0 Hz, 1C), 130.79 (1C), 131.00 (d, *J* = 101.6 Hz, 1C), 131.22 (d, *J* = 10.8 Hz, 2C), 132.29 (d, *J* = 2.8 Hz, 1C), 133.22 (d, *J* = 2.0 Hz, 1C), 134.09 (d, *J* = 1.5 Hz, 1C), 134.84 (d, *J* = 105.8 Hz, 1C), 139.62 (d, *J* = 19.7 Hz, 1C), 142.67 (d, *J* = 23.2 Hz, 1C); <sup>31</sup>P{<sup>1</sup>H} NMR (162 MHz, CDCl<sub>3</sub>): δ 33.90; HRMS (EI<sup>+</sup>)  $m/z$  ( $M^+$ ) calcd

for C<sub>26</sub>H<sub>17</sub>OP: 376.1017, found: 376.1016.

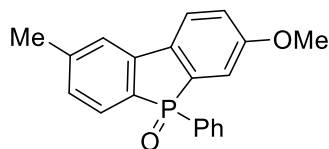

**7-Methoxy-2-methyl-5-phenylbenzo[*b*]phosphindole 5-oxide (2j):** 24 mg (76%); white solid; m.p. 148-149 °C; <sup>1</sup>H NMR (400 MHz, CDCl<sub>3</sub>): δ 2.33 (s, 3H), 3.80 (s, 3H), 7.08 (ddd, *J* = 8.5, 2.5, 0.7 Hz, 1H), 7.19 (dd, *J* = 10.9, 2.5 Hz, 1H), 7.34 (d, *J* = 7.9 Hz, 1H), 7.38-7.42 (m, 2H), 7.46-7.52 (m, 2H), 7.60 (dd, *J* = 7.8, 3.2 Hz, 1H), 7.64-7.69 (m, 3H); <sup>13</sup>C{<sup>1</sup>H} NMR (100 MHz, CDCl<sub>3</sub>): δ 21.34 (1C), 55.77 (1C), 114.01 (d, *J* = 10.9 Hz, 1C), 120.04 (d, *J* = 2.1 Hz, 1C), 120.43 (d, *J* = 10.9 Hz, 1C), 122.25 (d, *J* = 12.1 Hz, 1C), 128.86 (d, *J* = 12.4 Hz, 2C), 130.46 (d, *J* = 9.6 Hz, 1C), 131.21 (d, *J* = 10.8 Hz, 2C), 131.22 (d, *J* = 102.0 Hz, 1C), 132.24 (d, *J* = 2.9 Hz, 1C), 132.64 (d, *J* = 107.1 Hz, 1C), 134.30 (d, *J* = 2.1 Hz, 1C), 134.52 (d, *J* = 105.7 Hz, 1C), 134.79 (d, *J* = 21.3 Hz, 1C), 138.52 (d, *J* = 11.0 Hz, 1C), 139.48 (d, *J* = 21.3 Hz, 1C), 160.61 (d, *J* = 13.8 Hz, 1C); <sup>31</sup>P{<sup>1</sup>H} NMR (162 MHz, CDCl<sub>3</sub>): δ 33.68; HRMS (APCI) *m/z* (M+H)<sup>+</sup> calcd for C<sub>20</sub>H<sub>18</sub>O<sub>2</sub>P: 321.1039, found: 321.1043.

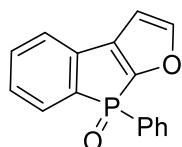

**8-Phenylphosphindolo[2,3-*b*]furan 8-oxide (2m):** 19 mg (73%); pale yellow solid; m.p. 69-70 °C; <sup>1</sup>H NMR (400 MHz, CDCl<sub>3</sub>): δ 6.74 (dd, *J* = 1.7, 1.0 Hz, 1H), 7.29-7.33 (m, 1H), 7.41-7.44 (m, 1H), 7.45-7.49 (m, 2H), 7.50-7.60 (m, 3H), 7.71-7.75 (m, 3H); <sup>13</sup>C{<sup>1</sup>H} NMR (100 MHz, CDCl<sub>3</sub>): δ 105.81 (d, *J* = 8.4 Hz, 1C), 121.68 (d, *J* = 7.4 Hz, 1C), 128.75 (d, *J* = 12.0 Hz, 1C), 128.92 (d, *J* = 110.9 Hz, 1C), 129.09 (d, *J* = 13.2 Hz, 2C), 130.26 (d, *J* = 10.4 Hz, 1C), 131.36 (d, *J* = 11.4 Hz, 2C), 132.80 (d, *J* = 2.9 Hz, 1C), 133.13 (d, *J* = 1.9 Hz, 1C), 133.24 (d, *J* = 12.5 Hz, 1C), 135.42 (d, *J* = 113.0 Hz, 1C), 142.21 (d, *J* = 33.3 Hz, 1C), 152.45 (d, *J* = 132.1 Hz, 1C), 153.30 (d, *J* = 6.6 Hz, 1C); <sup>31</sup>P{<sup>1</sup>H} NMR (162 MHz, CDCl<sub>3</sub>): δ 12.25; HRMS (EI<sup>+</sup>) *m/z* (M<sup>+</sup>) calcd for C<sub>16</sub>H<sub>11</sub>O<sub>2</sub>P: 266.0497, found: 266.0499.

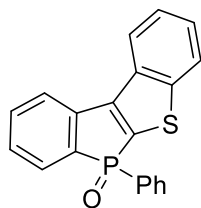

**6-Phenylbenzo[*b*]phosphindolo[3,2-*d*]thiophene 6-oxide (2o):** 28 mg (85%); white solid; m.p. 170-171 °C; <sup>1</sup>H NMR (400 MHz, CDCl<sub>3</sub>): δ 7.34-7.43 (m, 3H), 7.48-7.63 (m, 4H), 7.67-7.76 (m, 3H), 7.95 (d, *J* = 8.0 Hz, 1H), 8.04 (dd, *J* = 7.7, 3.5 Hz, 1H), 8.37 (d, *J* = 8.0 Hz, 1H); <sup>13</sup>C{<sup>1</sup>H} NMR (100 MHz, CDCl<sub>3</sub>): δ 121.76 (d, *J* = 9.8 Hz, 1C), 123.97 (1C), 124.31 (d, *J* = 1.4 Hz, 1C), 125.81 (1C), 126.80 (1C), 128.39 (d, *J* = 11.8 Hz, 1C), 129.06 (d, *J* = 13.0 Hz, 2C), 130.03 (d, *J* = 108.6 Hz, 1C), 130.23 (d, *J* = 10.2 Hz, 1C), 131.31 (d, *J* = 11.1 Hz, 2C), 132.71 (d, *J* = 2.9 Hz, 1C), 133.31 (d, *J* = 2.0 Hz, 1C), 133.49 (d, *J* = 11.8 Hz, 1C), 134.35 (d, *J* = 106.1 Hz, 1C), 137.32 (d, *J* = 109.1 Hz, 1C), 139.23 (d, *J* = 18.4 Hz, 1C), 146.90 (d, *J* = 21.8 Hz, 1C), 148.67 (d, *J* = 5.3 Hz, 1C); <sup>31</sup>P{<sup>1</sup>H} NMR (162 MHz, CDCl<sub>3</sub>): δ 26.48; HRMS (EI<sup>+</sup>) *m/z* (M<sup>+</sup>) calcd for C<sub>20</sub>H<sub>13</sub>OPS: 332.0425, found: 332.0425.

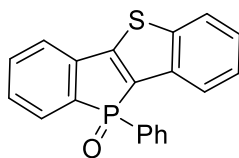

**10-Phenylbenzo[*b*]phosphindolo[2,3-*d*]thiophene 10-oxide (2p):** 28 mg (84%); pale yellow solid; m.p. 61-62 °C; <sup>1</sup>H NMR (400 MHz, CDCl<sub>3</sub>): δ 7.32-7.43 (m, 5H), 7.49-7.54 (m, 3H), 7.68 (dd, *J* = 10.3, 7.4 Hz, 1H), 7.74-7.81 (m, 3H), 7.86-7.88 (m, 1H); <sup>13</sup>C{<sup>1</sup>H} NMR (100 MHz, CDCl<sub>3</sub>): δ 122.08 (d, *J* = 8.8 Hz, 1C), 123.56 (d, *J* = 4.1 Hz, 2C), 125.62 (1C), 126.16 (1C), 129.09 (d, *J* = 12.6 Hz, 2C), 129.64 (d, *J* = 11.3 Hz, 1C), 129.69 (d, *J* = 9.8 Hz, 1C), 129.94 (d, *J* = 105.7 Hz, 1C), 130.74 (d, *J* = 107.9 Hz, 1C), 131.07 (d, *J* = 11.1 Hz, 2C), 132.61 (d, *J* = 2.9 Hz, 1C), 133.27 (d, *J* = 1.8 Hz, 1C), 136.24 (d, *J* = 12.5 Hz, 1C), 136.74 (d, *J* = 108.8 Hz, 1C), 137.63 (d, *J* = 18.6 Hz, 1C), 143.34 (d, *J* = 12.3 Hz, 1C), 154.78 (d, *J* = 27.3 Hz, 1C); <sup>31</sup>P{<sup>1</sup>H} NMR (162 MHz, CDCl<sub>3</sub>): δ 25.24; HRMS (APCI) *m/z* (M+H)<sup>+</sup> calcd for C<sub>20</sub>H<sub>14</sub>OPS: 333.0497, found: 333.0496.

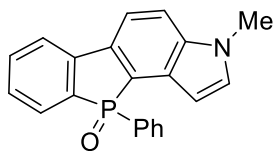

**3-Methyl-10-phenyl-3*H*-phosphindolo[2,3-*e*]indole 10-oxide (2q):** 17 mg (51% combined yield as a regiomixture of **2p** and **2p'**); pale yellow solid; m.p. 219-220 °C; <sup>1</sup>H NMR (400 MHz, CDCl<sub>3</sub>): δ 3.80 (s, 3H), 6.57 (dd, *J* = 3.1, 0.8 Hz, 1H), 7.10 (d, *J* = 3.1 Hz, 1H), 7.26-7.31 (m, 1H), 7.33-7.38 (m, 2H), 7.42-7.47 (m, 1H), 7.49-7.52 (m, 1H), 7.54 (ddd, *J* = 7.6, 1.3, 1.3 Hz, 1H), 7.66 (dd, *J* = 8.6, 2.7 Hz, 1H), 7.68-7.74 (m, 3H), 7.79 (dd, *J* = 7.7, 3.0 Hz, 1H); <sup>13</sup>C{<sup>1</sup>H} NMR (100 MHz, CDCl<sub>3</sub>): δ 33.30 (1C),

100.70 (d,  $J = 2.5$  Hz, 1C), 114.33 (d,  $J = 2.2$  Hz, 1C), 114.54 (d,  $J = 10.8$  Hz, 2C), 120.65 (d,  $J = 10.3$  Hz, 1C), 123.22 (d,  $J = 108.1$  Hz, 1C), 128.05 (d,  $J = 11.0$  Hz, 1C), 128.56 (d,  $J = 10.5$  Hz, 1C), 128.77 (d,  $J = 12.4$  Hz, 2C), 129.87 (d,  $J = 9.8$  Hz, 1C), 131.19 (d,  $J = 10.9$  Hz, 1C), 131.64 (d,  $J = 101.0$  Hz, 1C), 131.98 (d,  $J = 2.9$  Hz, 1C), 132.38 (1C), 132.92 (d,  $J = 106.7$  Hz, 1C), 133.22 (d,  $J = 1.9$  Hz, 1C), 134.86 (d,  $J = 21.0$  Hz, 1C), 137.74 (d,  $J = 11.9$  Hz, 1C), 143.69 (d,  $J = 22.7$  Hz, 1C);  $^{31}\text{P}\{^1\text{H}\}$  NMR (162 MHz,  $\text{CDCl}_3$ ):  $\delta$  33.69; HRMS ( $\text{EI}^+$ )  $m/z$  ( $\text{M}^+$ ) calcd for  $\text{C}_{21}\text{H}_{16}\text{NOP}$ : 329.0970, found: 329.0965.

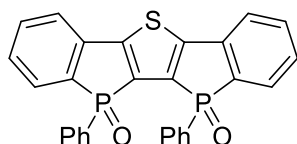

**5,6-Diphenyldiphosphindolo[3,2-*b*:2',3'-*d*]thiophene 5,6-dioxide (2r, *syn* + *anti*, ca. 1:1 mixture):**

32 mg (67%); pale yellow solid;  $^1\text{H}$  NMR (400 MHz,  $\text{CDCl}_3$  + 5%  $\text{D}_2\text{O}$ ):  $\delta$  7.05 (ddd,  $J = 7.7, 7.7, 3.2$  Hz, 3H), 7.25-7.43 (m, 5H), 7.46-7.61 (m, 8H), 7.76 (dd,  $J = 9.9, 7.3$  Hz, 1H), 7.89-7.94 (m, 1H);  $^{13}\text{C}\{^1\text{H}\}$  NMR (100 MHz,  $\text{CDCl}_3$  + 5%  $\text{D}_2\text{O}$ ):  $\delta$  121.45 (d,  $J = 8.0$  Hz, 2C), 121.53 (d,  $J = 8.1$  Hz, 2C), 128.00 (d,  $J = 107.1$  Hz, 2C), 128.71 (d,  $J = 13.1$  Hz, 4C), 129.11 (d,  $J = 13.2$  Hz, 4C), 129.38 (d,  $J = 11.3$  Hz, 2C), 129.55 (d,  $J = 108.2$  Hz, 2C), 129.56 (d,  $J = 11.6$  Hz, 2C), 130.15 (d,  $J = 10.1$  Hz, 2C), 130.31 (d,  $J = 9.4$  Hz, 2C), 130.64 (d,  $J = 11.4$  Hz, 4C), 131.4 (d,  $J = 11.5$  Hz, 4C), 132.42 (d,  $J = 3.0$  Hz, 2C), 132.96 (d,  $J = 2.9$  Hz, 2C), 133.47 (d,  $J = 1.9$  Hz, 2C), 133.71 (d,  $J = 1.5$  Hz, 2C), 134.84 (dd,  $J = 106.8, 15.0$  Hz, 2C), 134.98 (d,  $J = 109.3$  Hz, 2C), 135.03 (dd,  $J = 107.5, 15.1$  Hz, 2C), 135.06 (d,  $J = 110.6$  Hz, 2C), 136.97 (d,  $J = 2.1$  Hz, 2C), 137.14 (d,  $J = 2.2$  Hz, 2C), 156.33 (dd,  $J = 29.7, 13.0$  Hz, 2C), 156.94 (dd,  $J = 28.8, 12.8$  Hz, 2C);  $^{31}\text{P}\{^1\text{H}\}$  NMR (162 MHz,  $\text{CDCl}_3$  + 5%  $\text{D}_2\text{O}$ ):  $\delta$  23.90, 25.39; HRMS (APCI)  $m/z$  ( $\text{M}+\text{H}^+$ ) calcd for  $\text{C}_{28}\text{H}_{19}\text{O}_2\text{P}_2\text{S}$ : 481.0575, found: 481.0575.

[ $^1\text{H}$ ,  $^{13}\text{C}\{^1\text{H}\}$ , and  $^{31}\text{P}\{^1\text{H}\}$  NMR Spectra of **2a**]

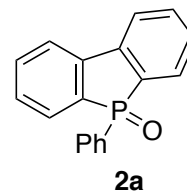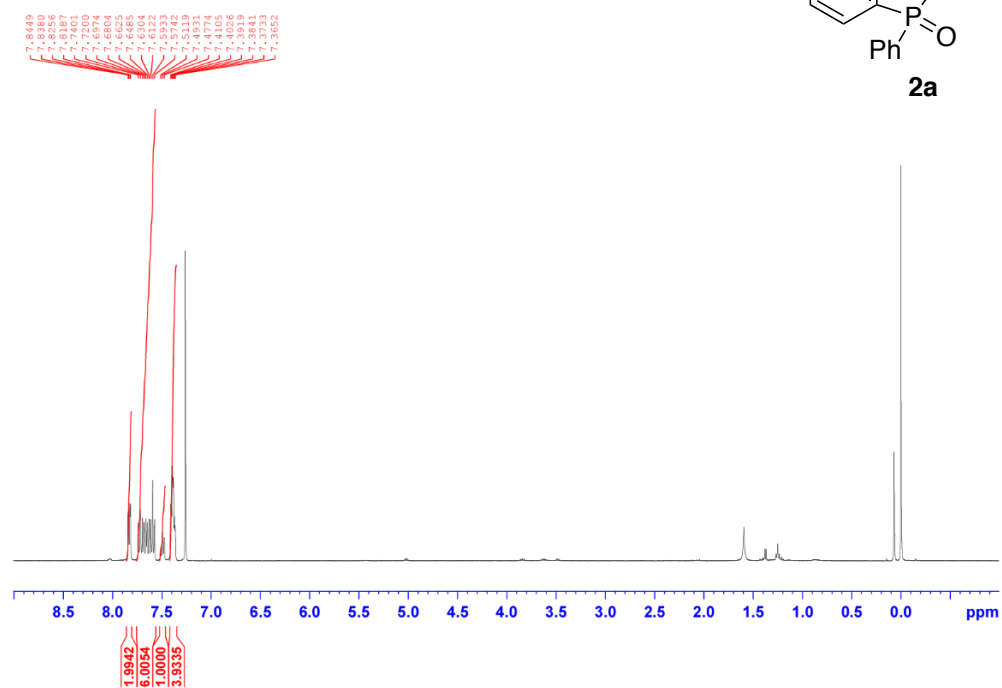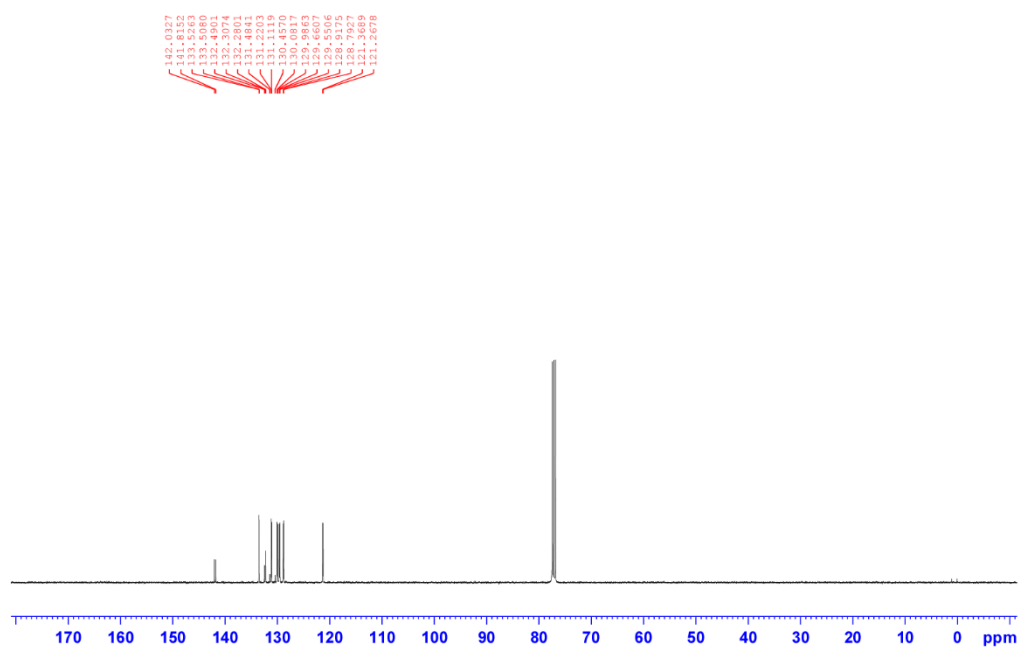



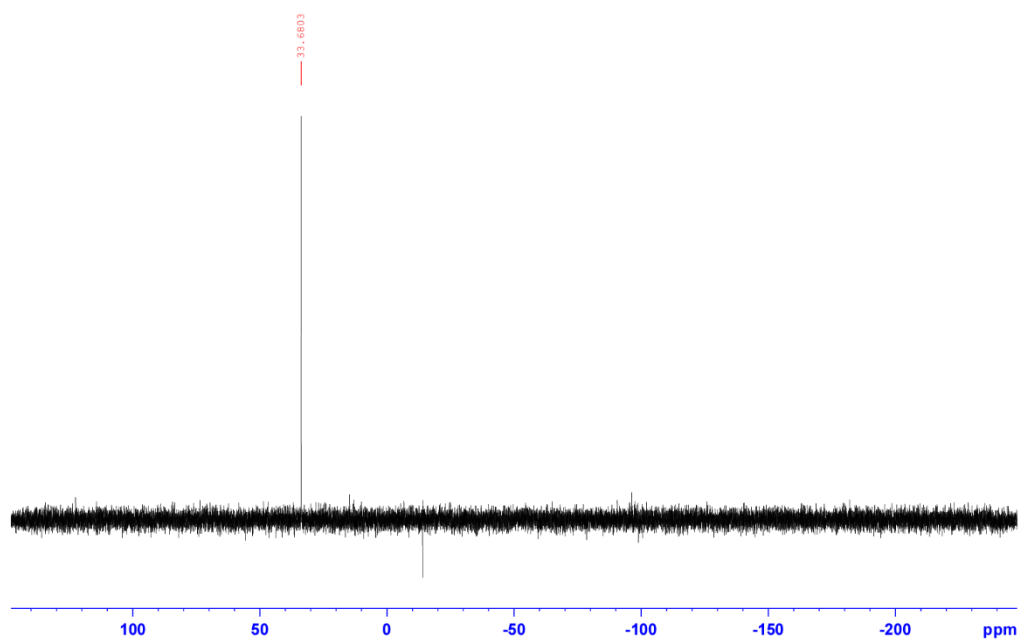

$[^1\text{H}$ ,  $^{13}\text{C}\{^1\text{H}\}$ , and  $^{31}\text{P}\{^1\text{H}\}$  NMR Spectra of **2b**]

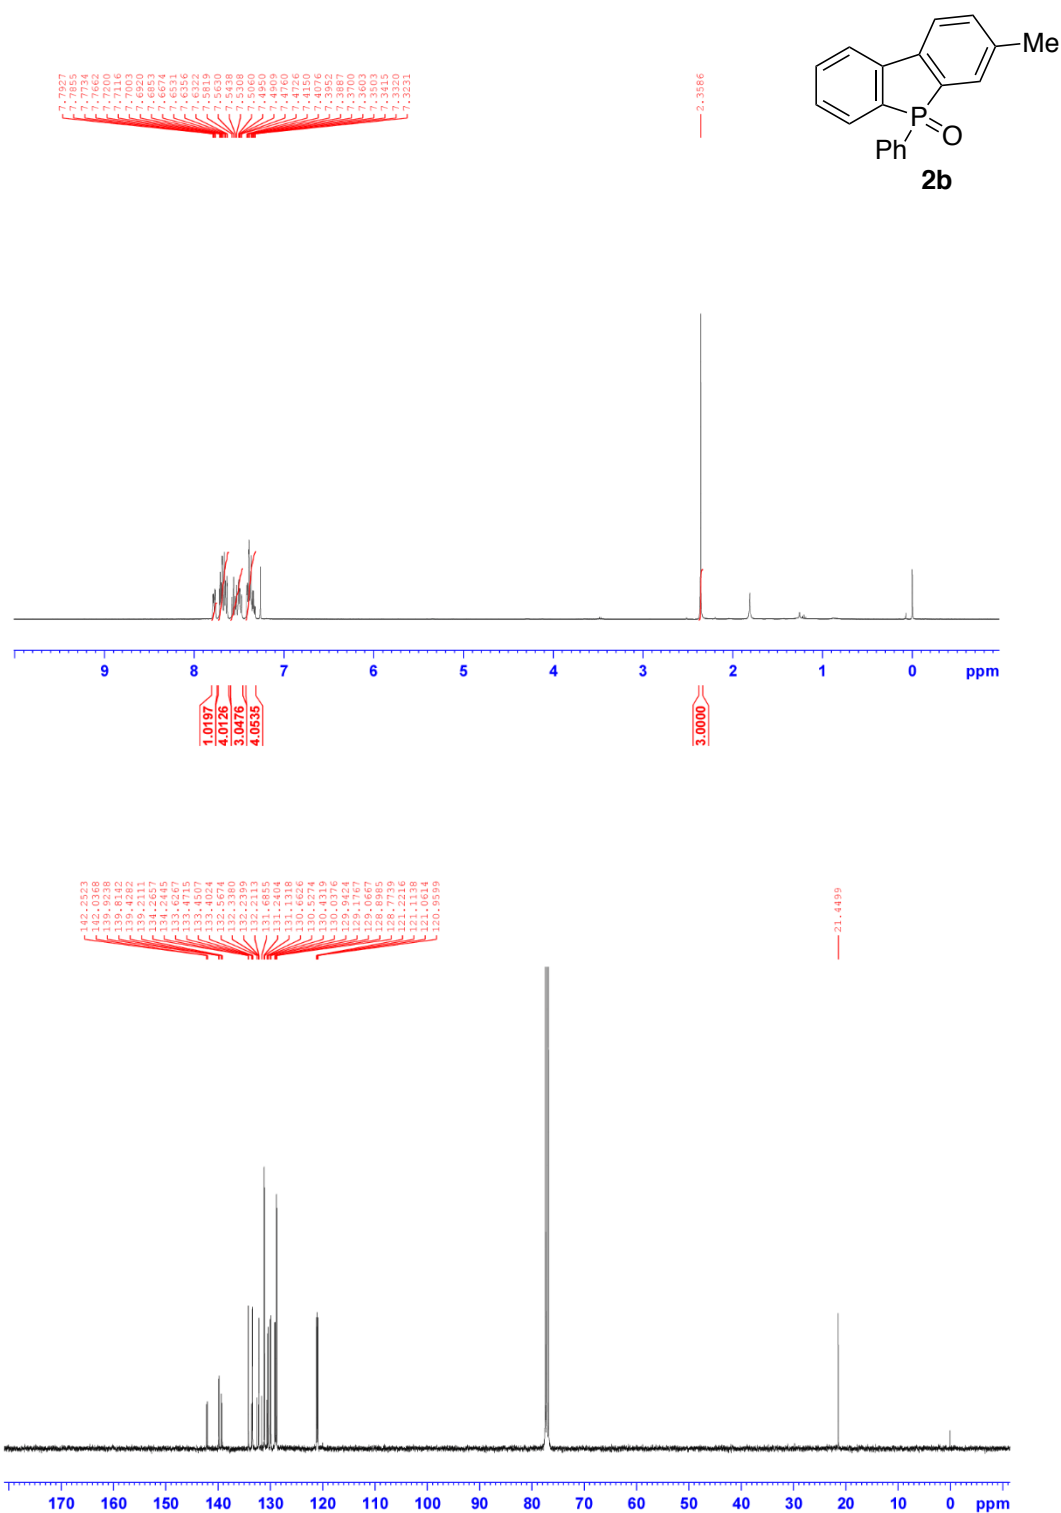

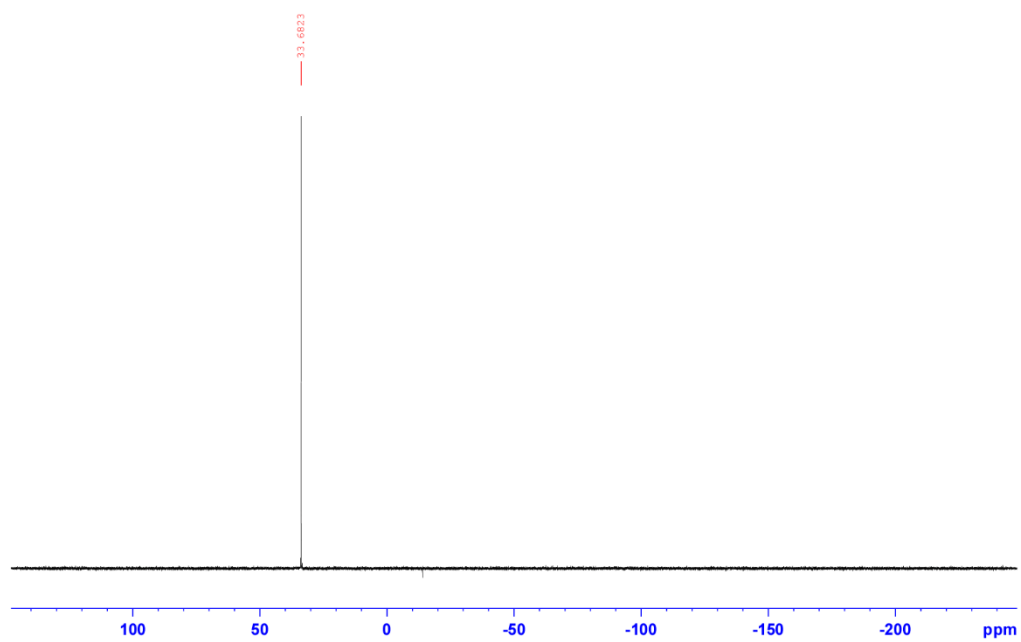

[<sup>1</sup>H, <sup>13</sup>C{<sup>1</sup>H}, and <sup>31</sup>P{<sup>1</sup>H} NMR Spectra of **2c**]

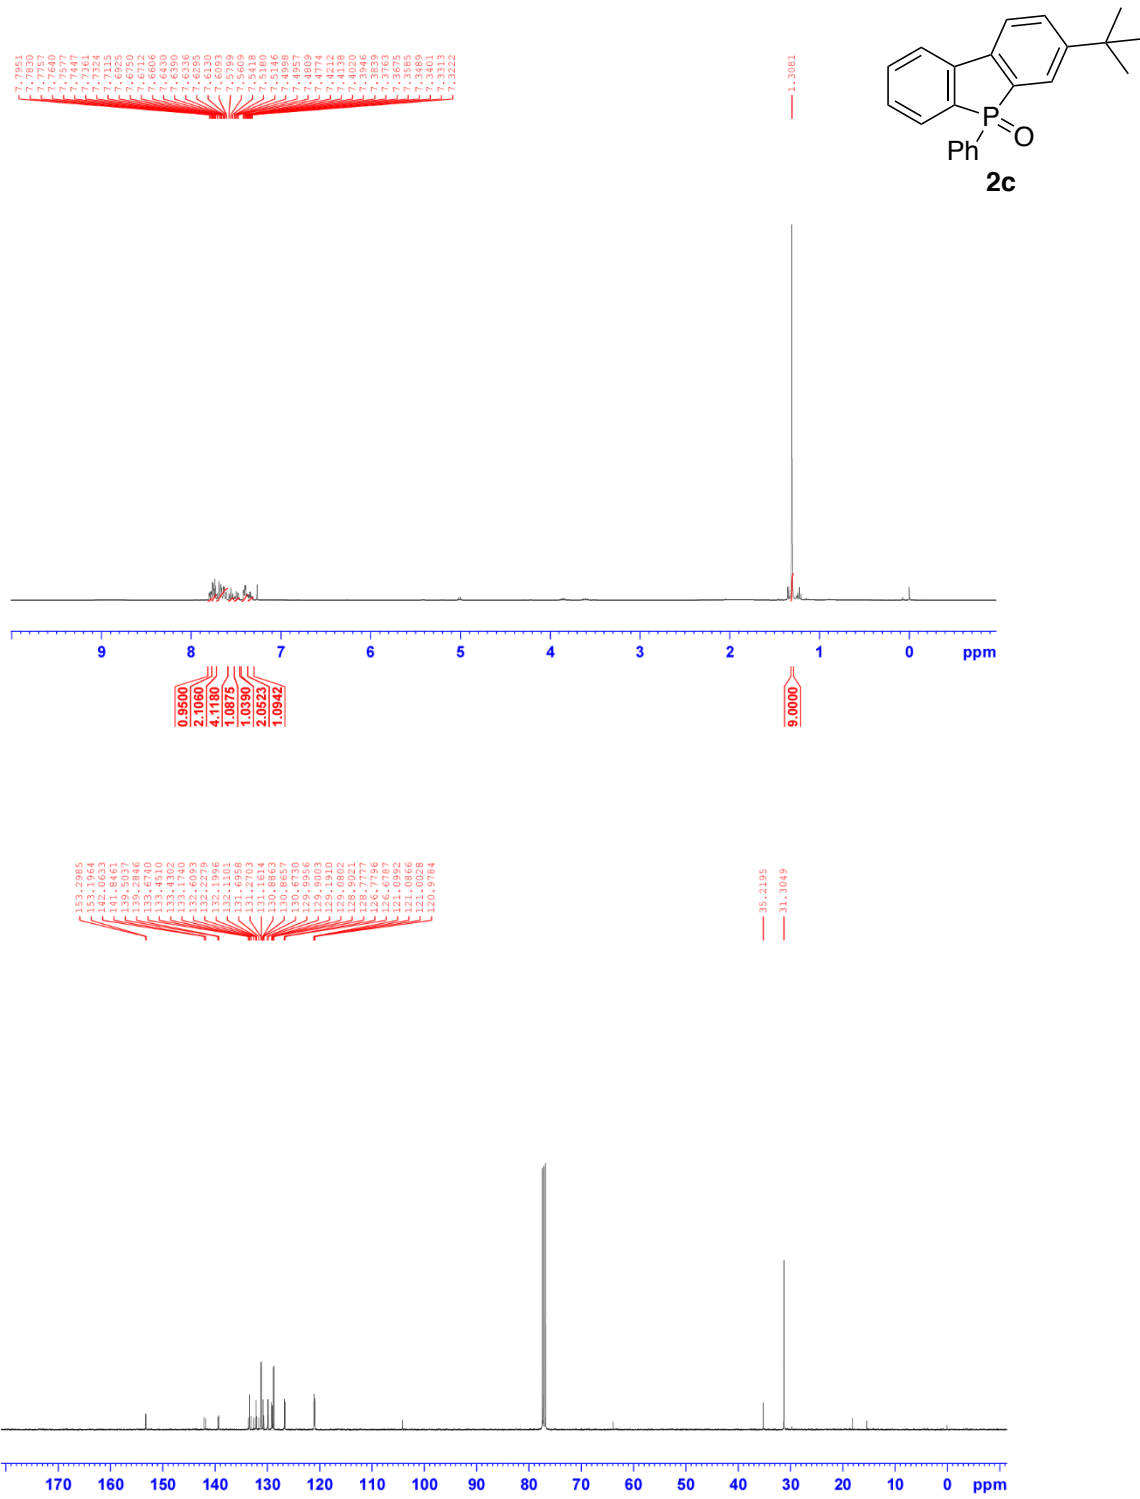

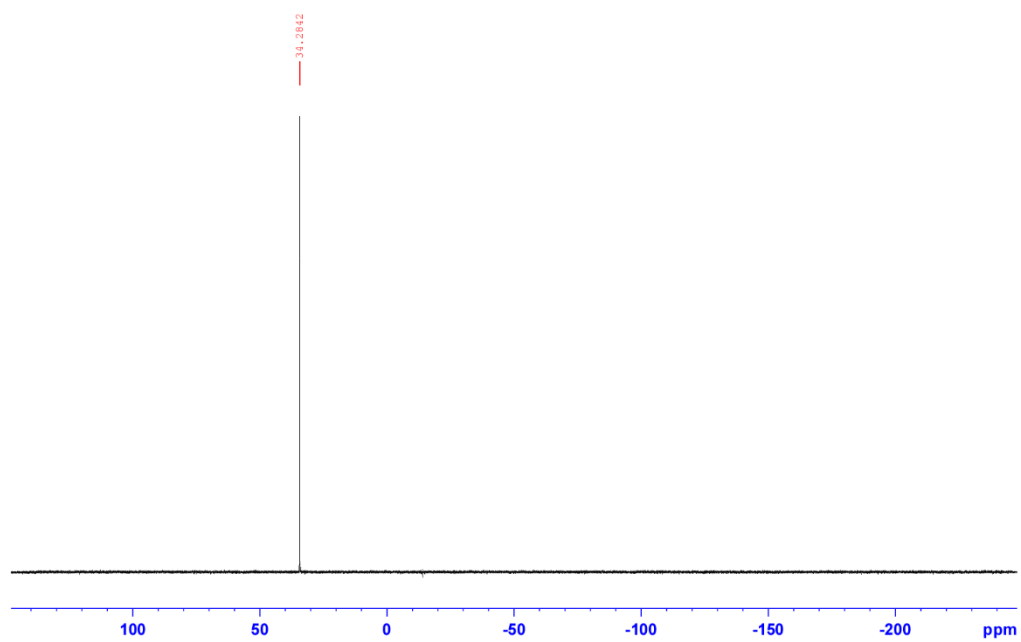

$[^1\text{H}, ^{13}\text{C}\{^1\text{H}\}, \text{ and } ^{31}\text{P}\{^1\text{H}\}]$  NMR Spectra of **2d**

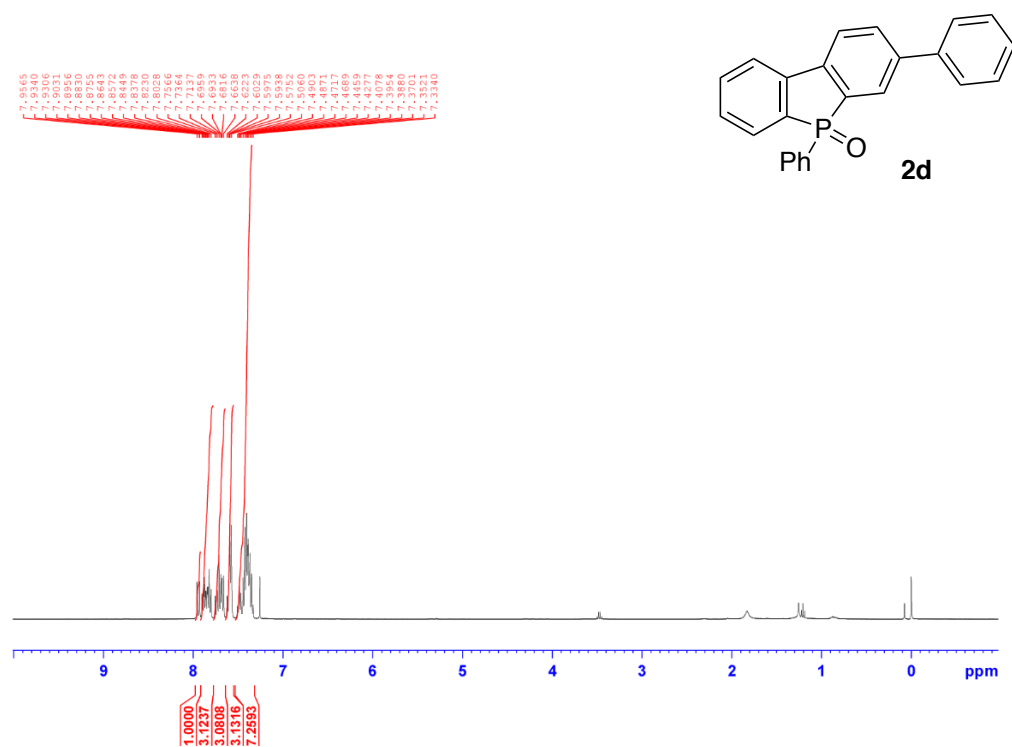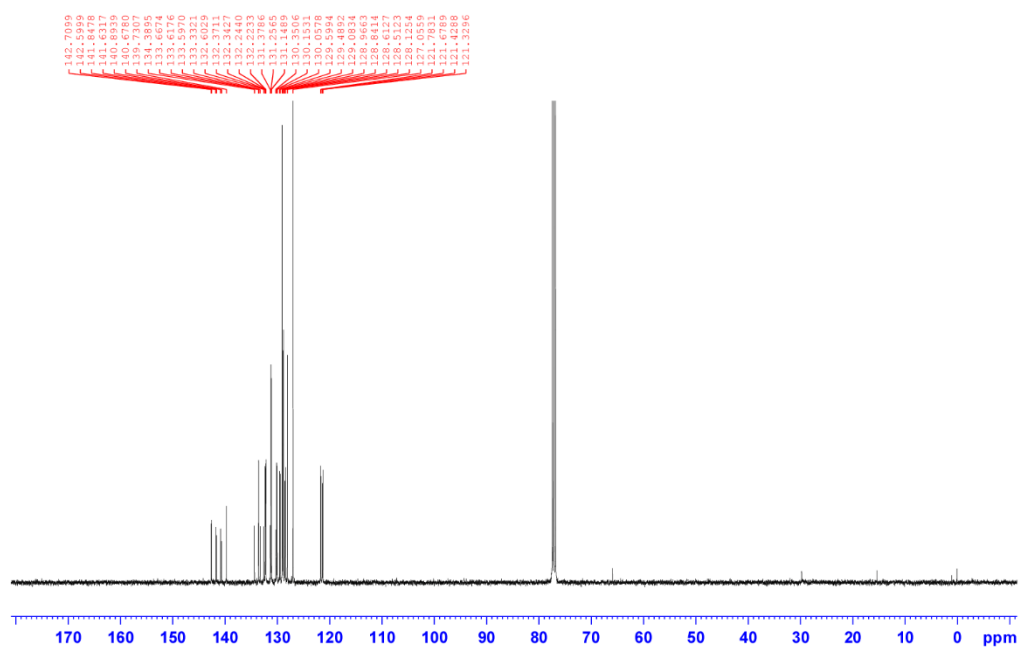

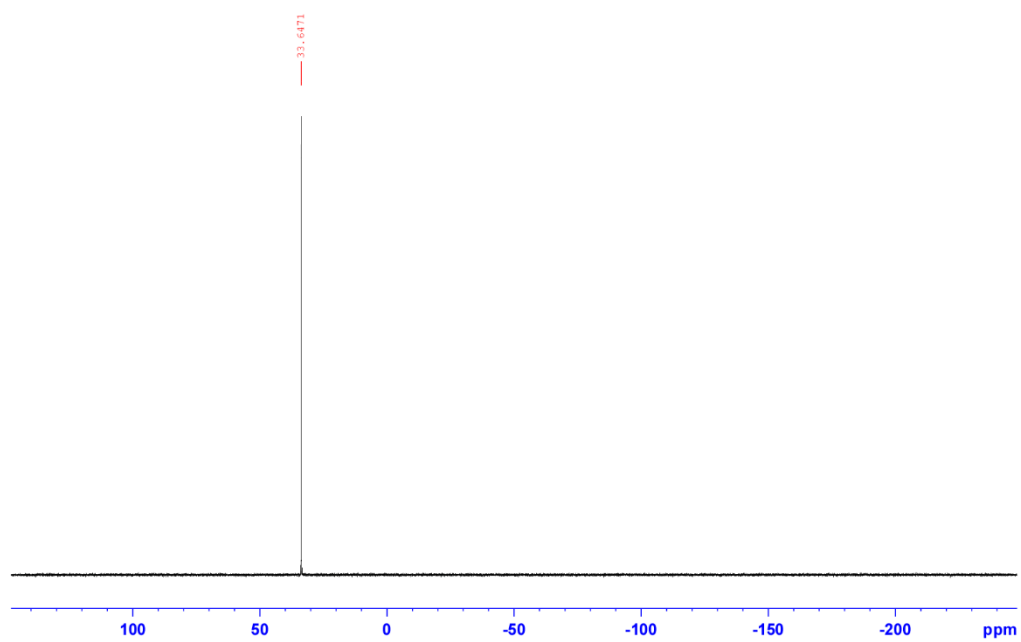

[<sup>1</sup>H, <sup>13</sup>C{<sup>1</sup>H}, and <sup>31</sup>P{<sup>1</sup>H} NMR Spectra of **2e**]

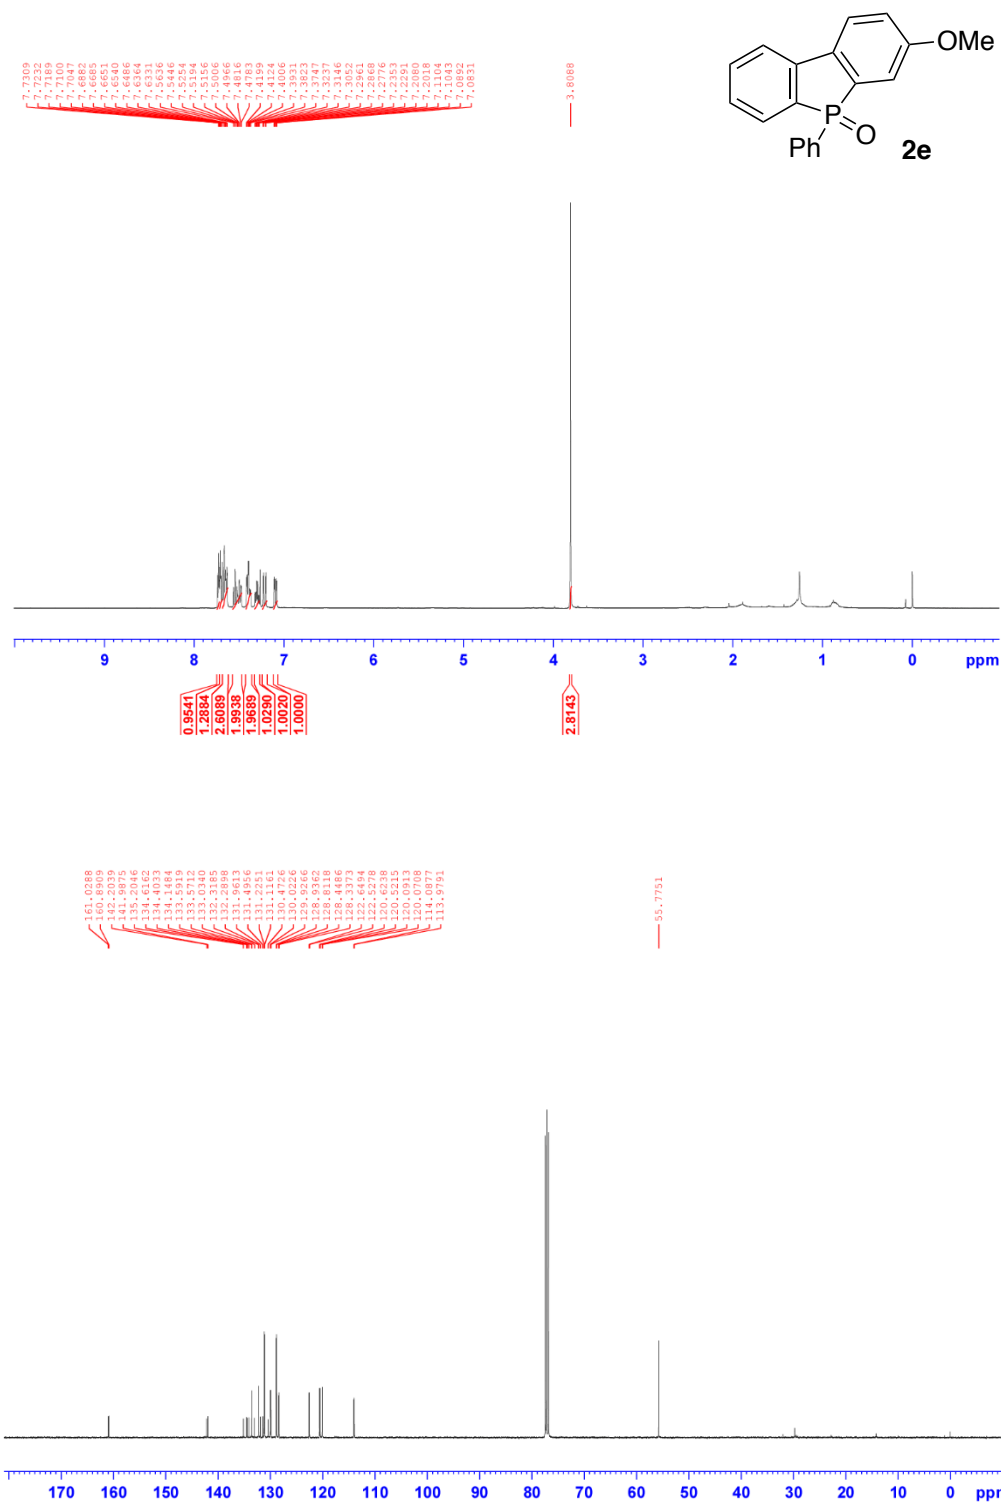



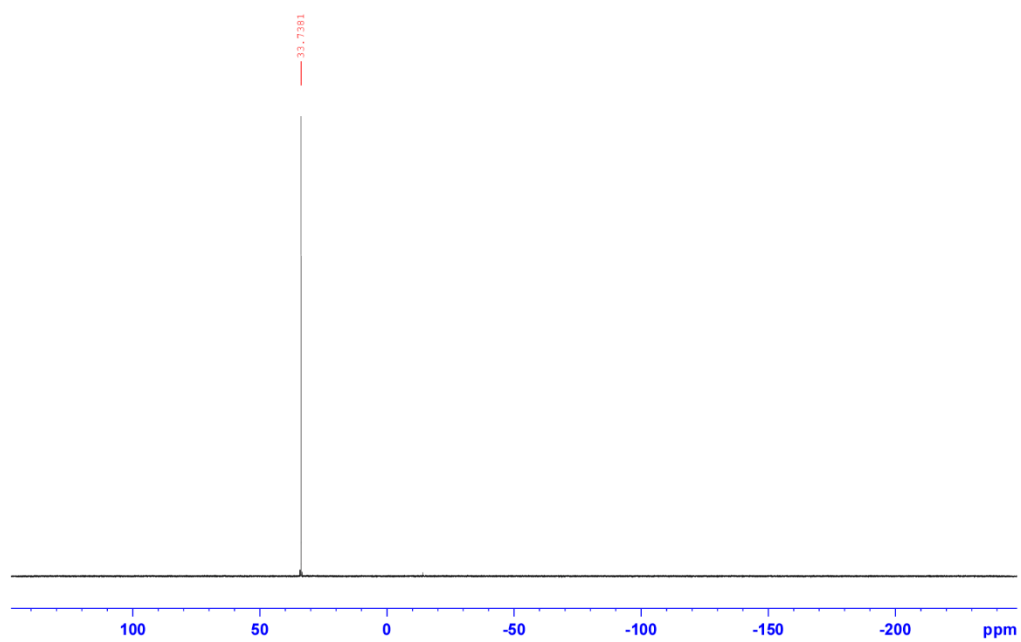

$[^1\text{H}$ ,  $^{13}\text{C}\{^1\text{H}\}$ , and  $^{31}\text{P}\{^1\text{H}\}$  NMR Spectra of **2f**

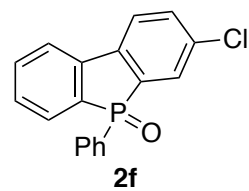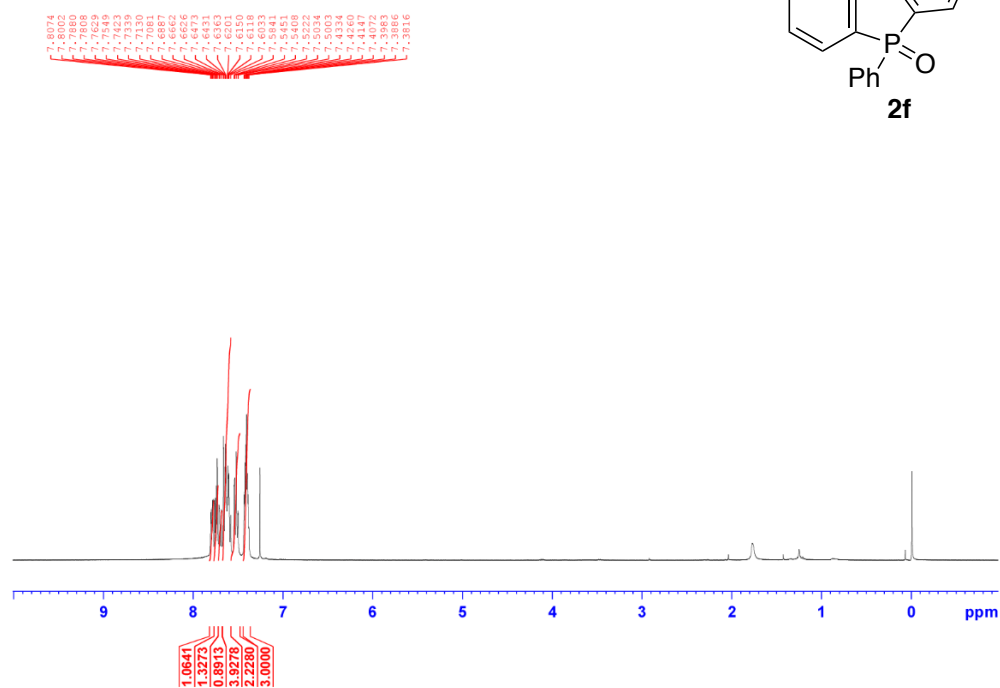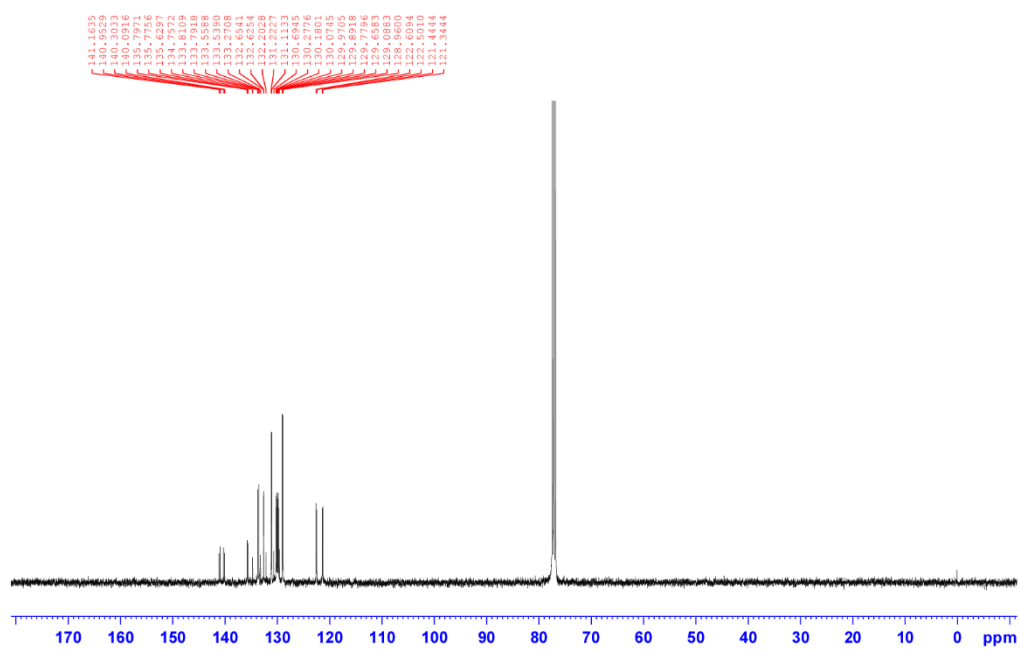

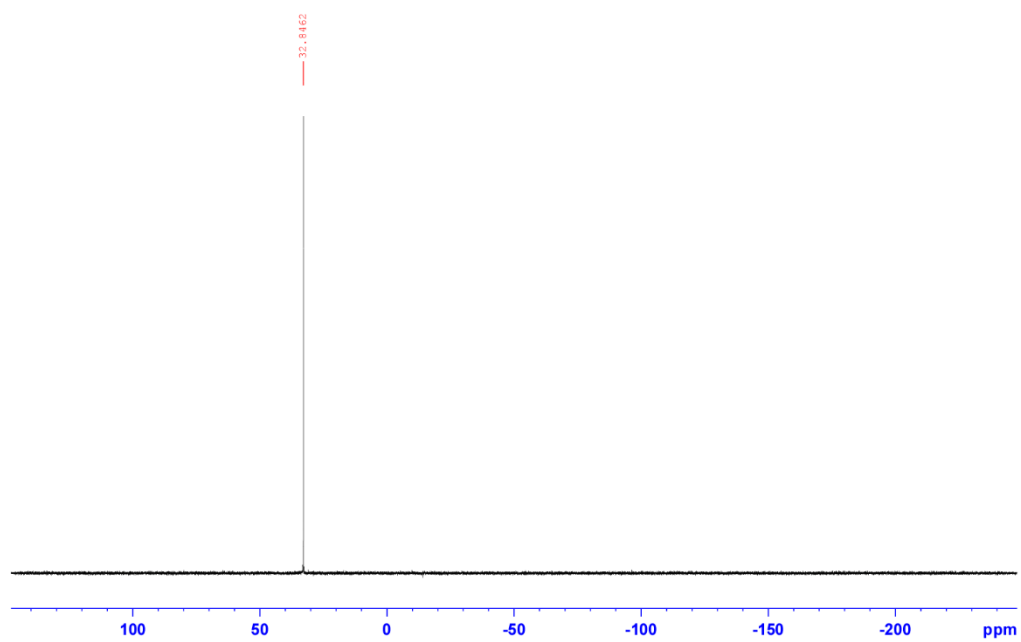

$[^1\text{H}$ ,  $^{13}\text{C}\{^1\text{H}\}$ , and  $^{31}\text{P}\{^1\text{H}\}$  NMR Spectra of **2g**]

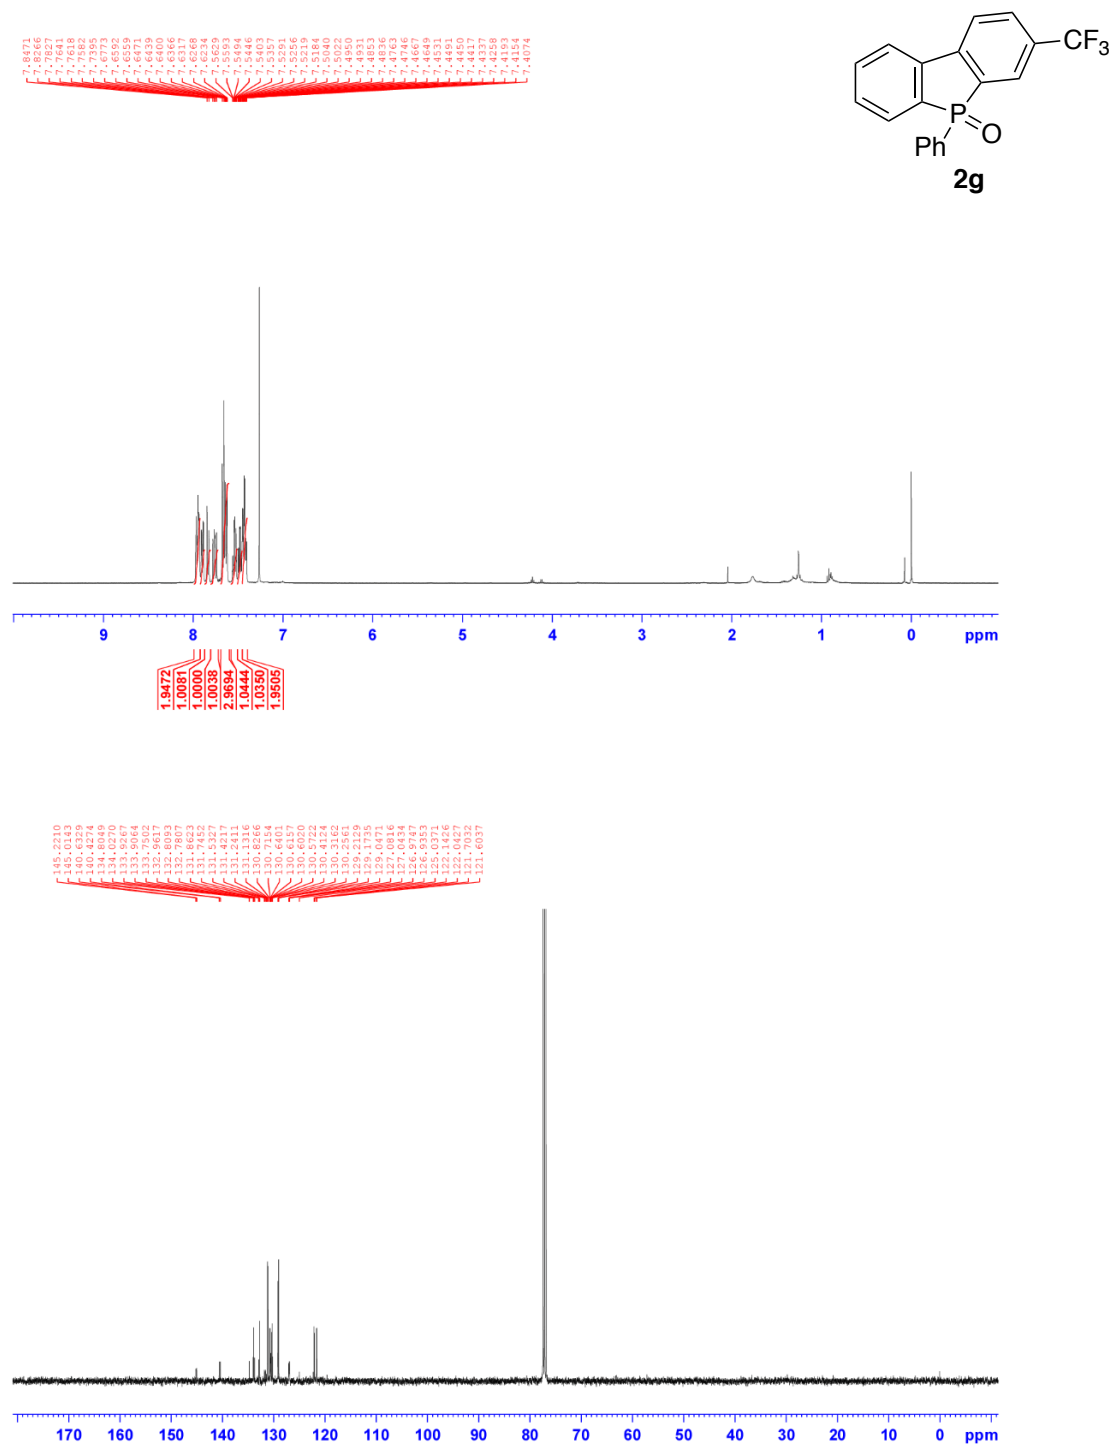

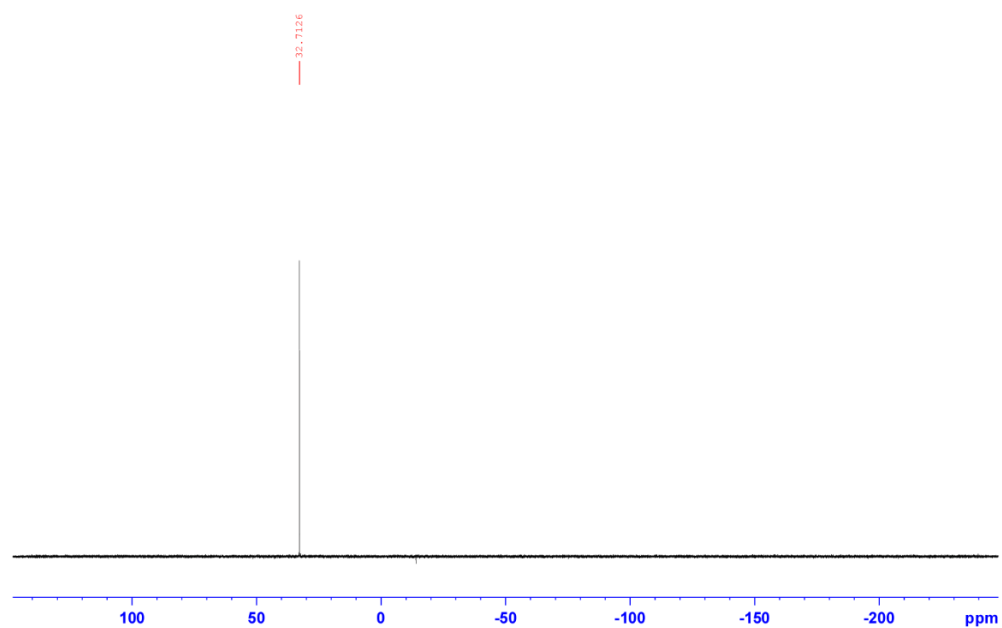

$[^1\text{H}, ^{13}\text{C}\{^1\text{H}\}, \text{ and } ^{31}\text{P}\{^1\text{H}\}]$  NMR Spectra of **2h**

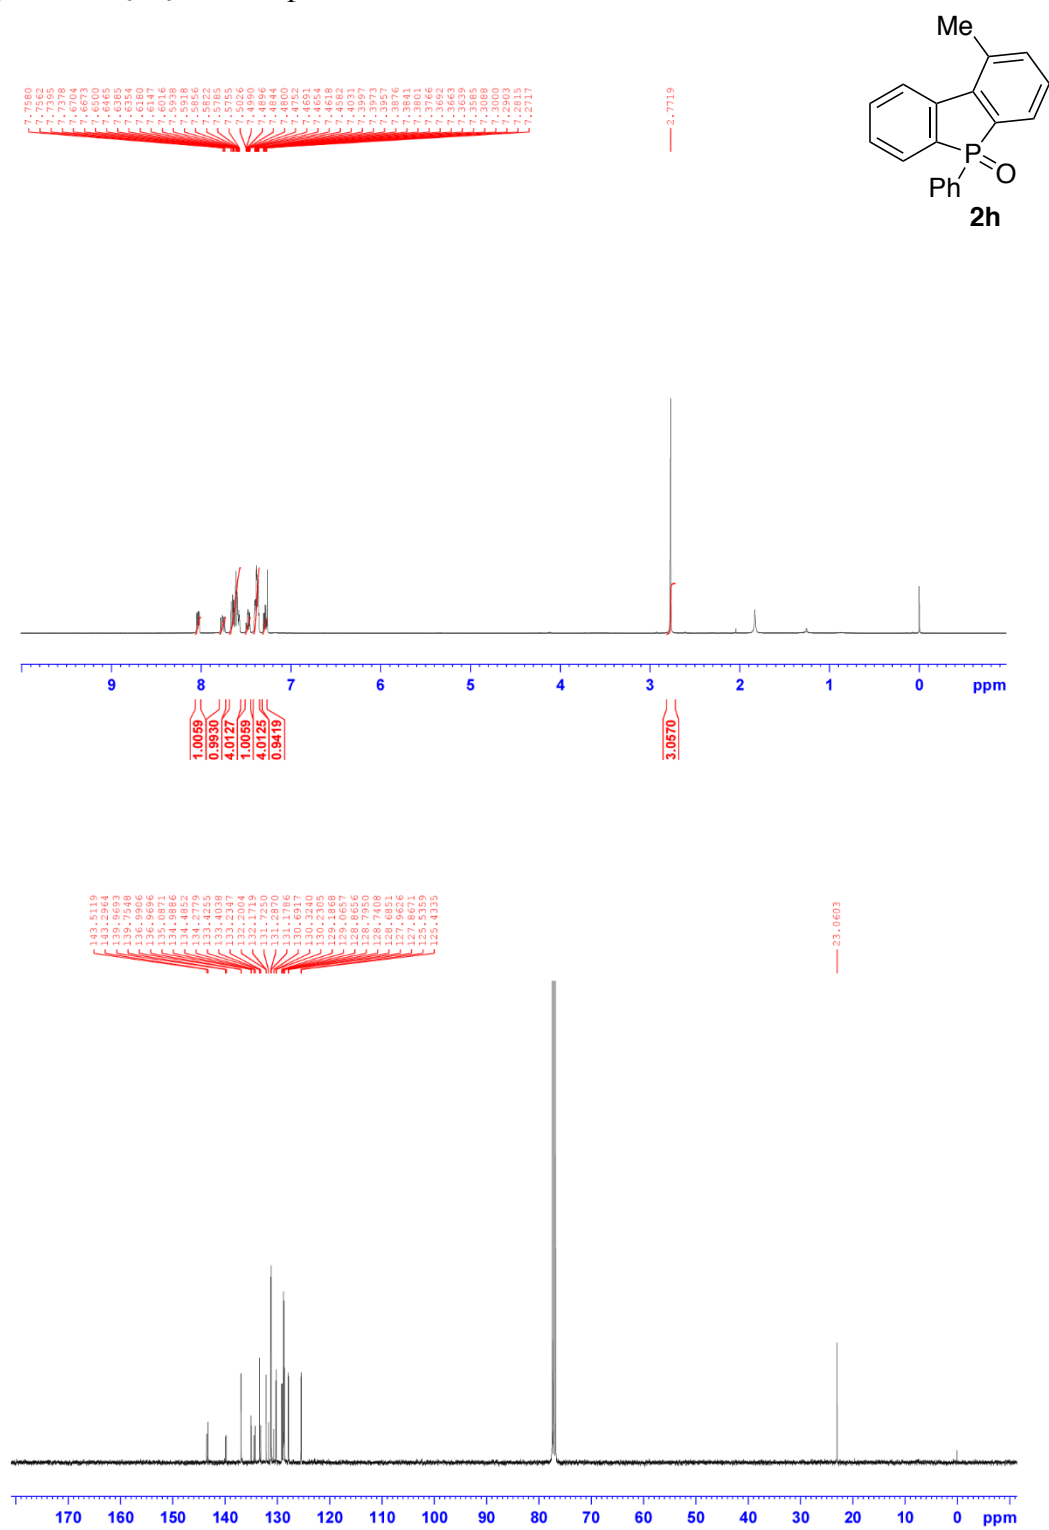

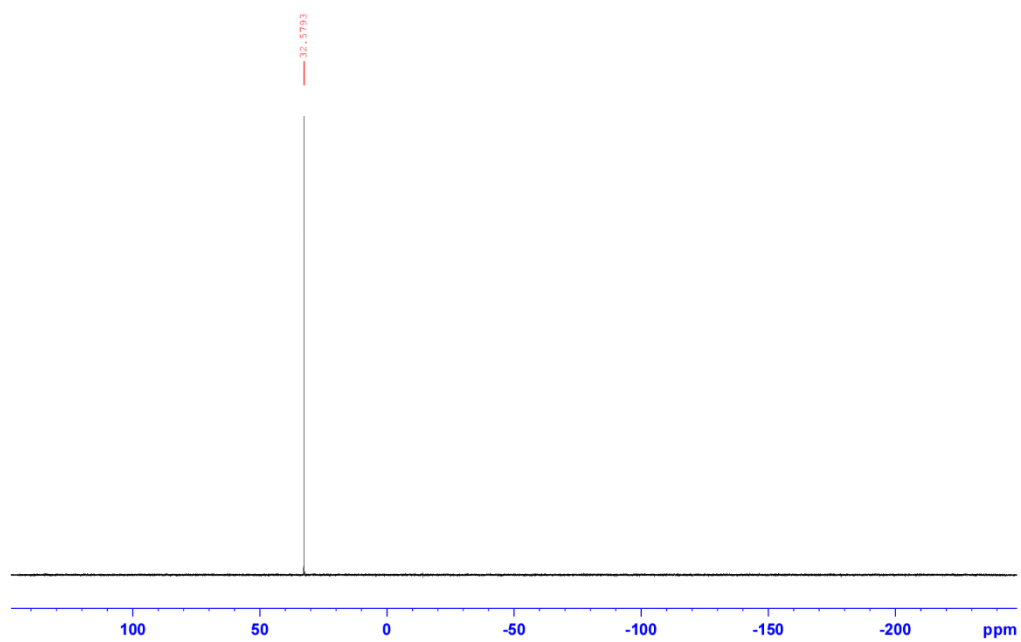

**[<sup>1</sup>H, <sup>13</sup>C{<sup>1</sup>H}, and <sup>31</sup>P{<sup>1</sup>H} NMR Spectra of **2i**]**

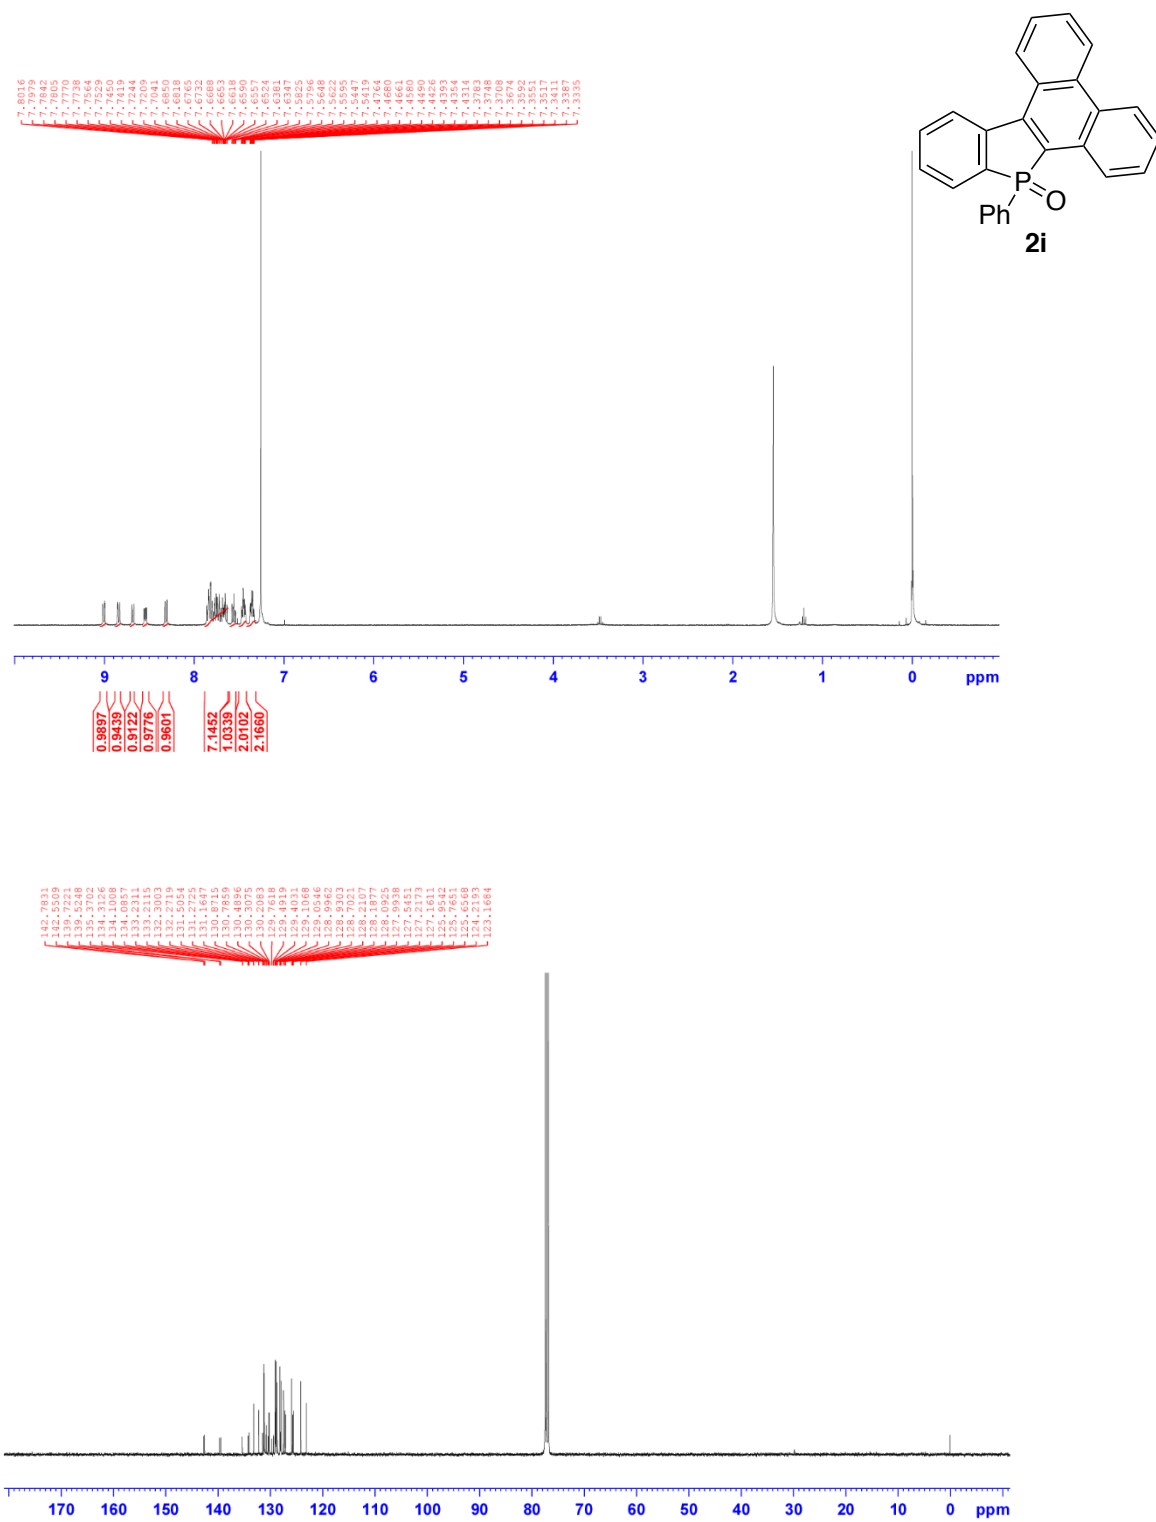



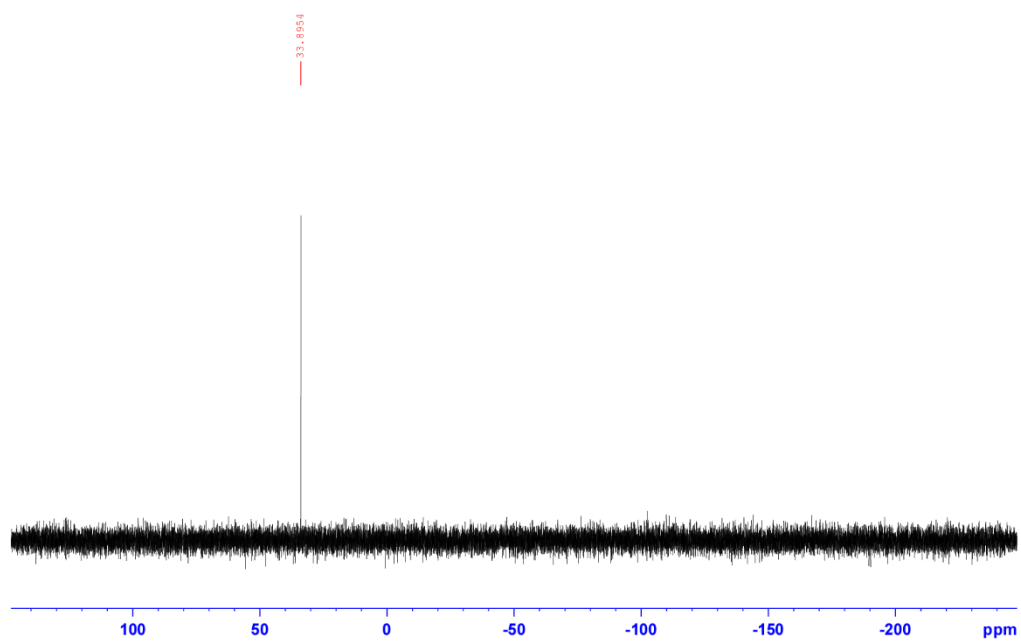

$[^1\text{H}, ^{13}\text{C}\{^1\text{H}\}, \text{ and } ^{31}\text{P}\{^1\text{H}\} \text{ NMR Spectra of } \mathbf{2j}]$ 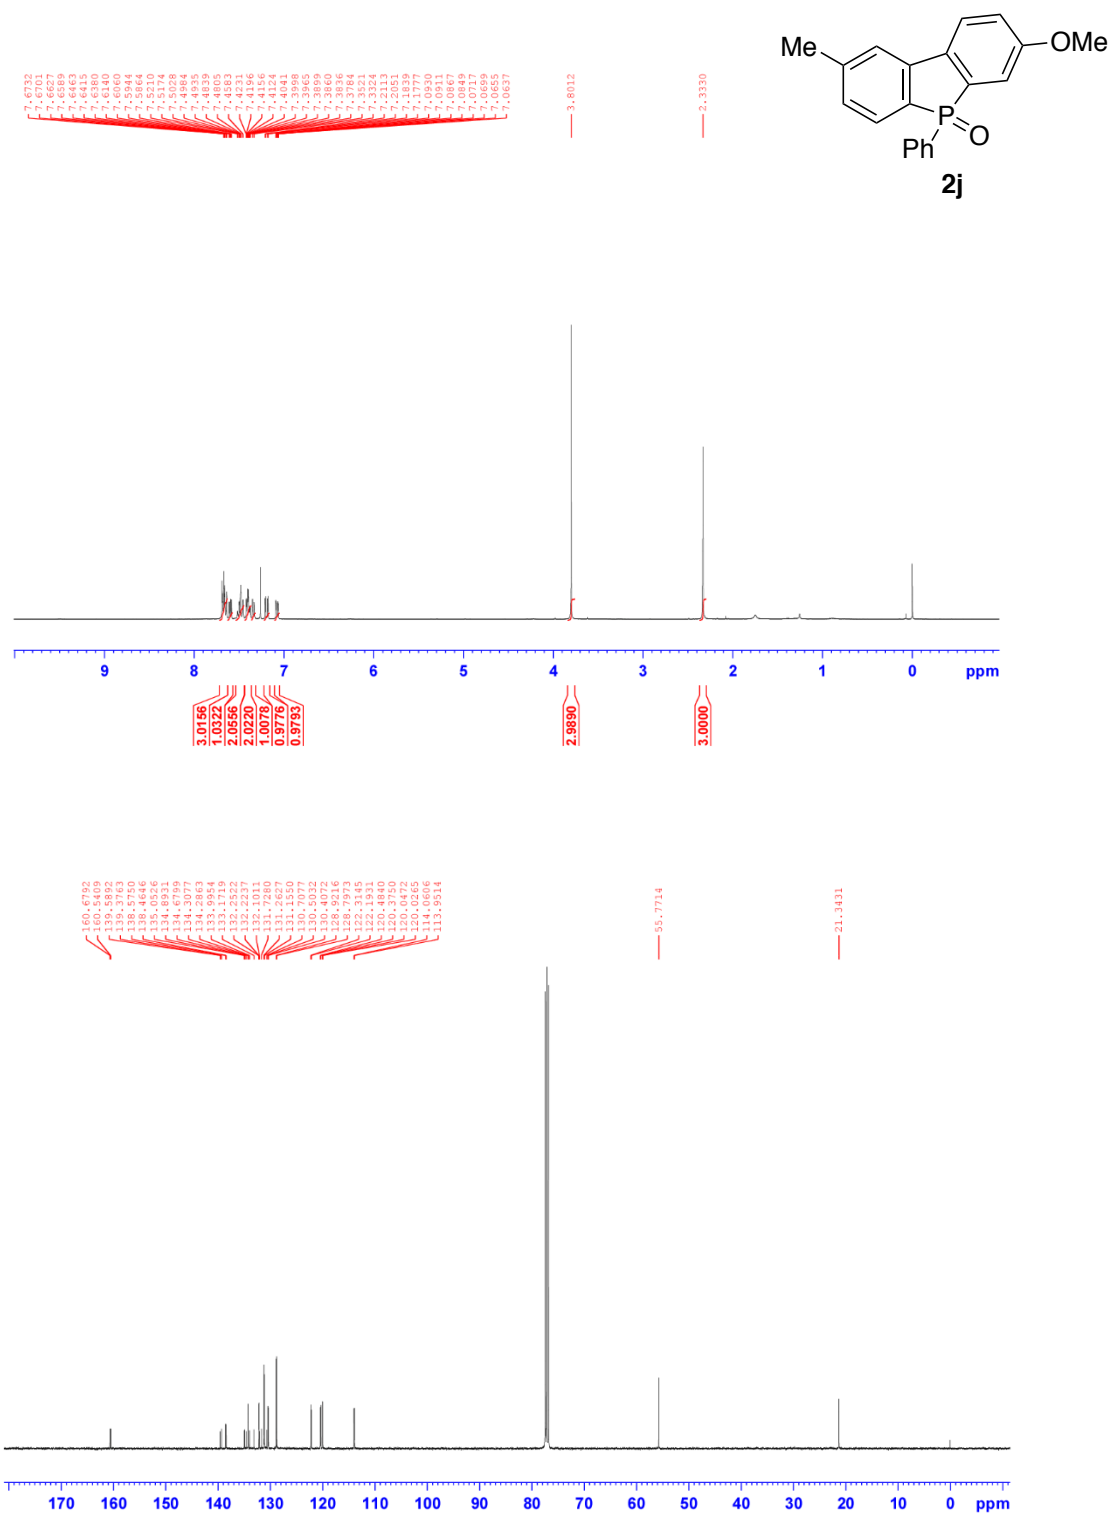

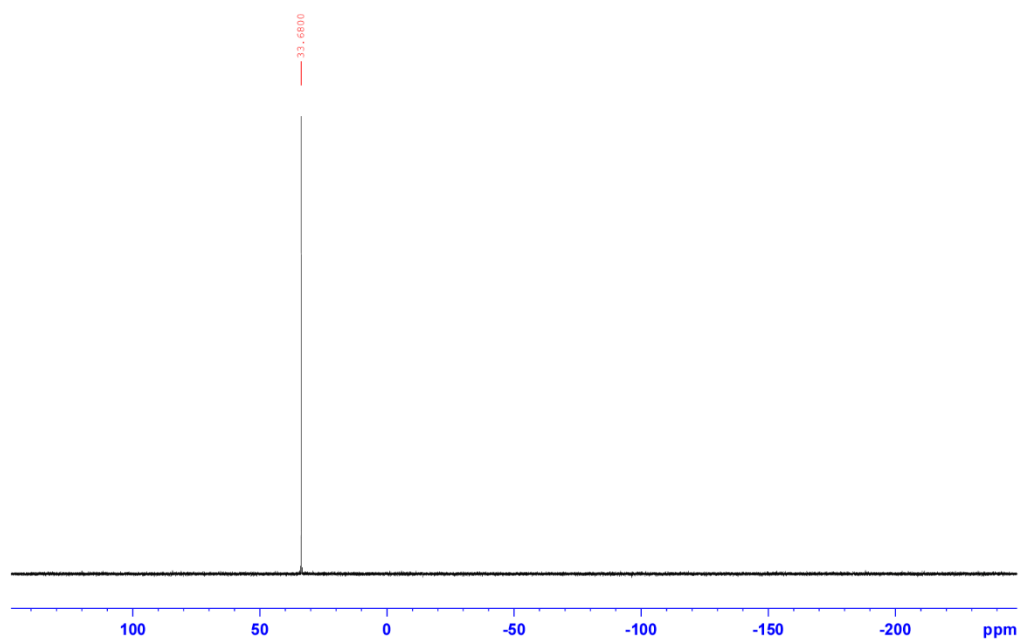

**[<sup>1</sup>H, <sup>13</sup>C{<sup>1</sup>H}, and <sup>31</sup>P{<sup>1</sup>H} NMR Spectra of **2k** + **2k'**]**

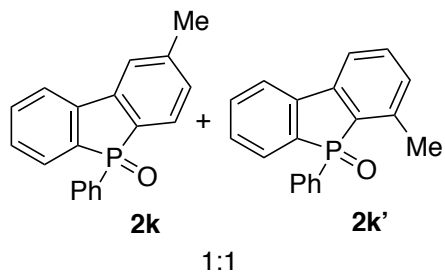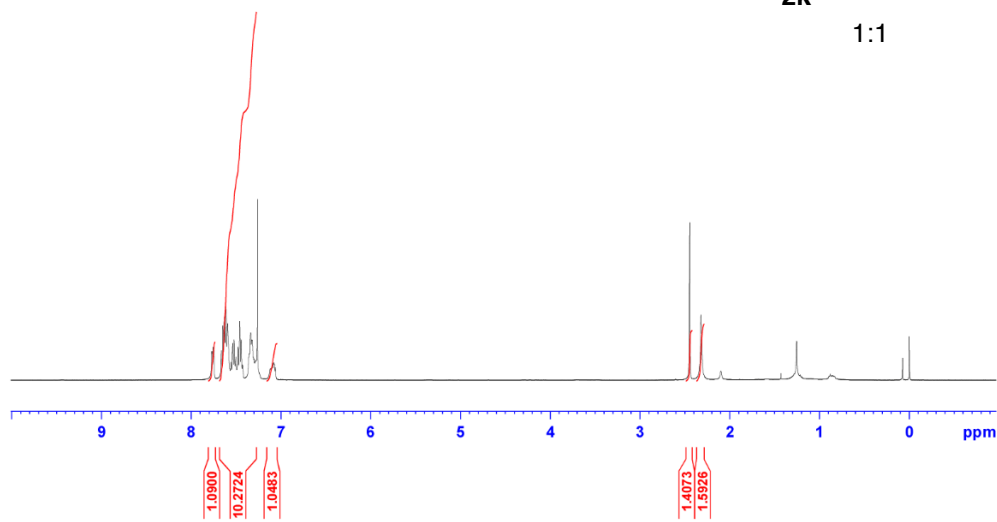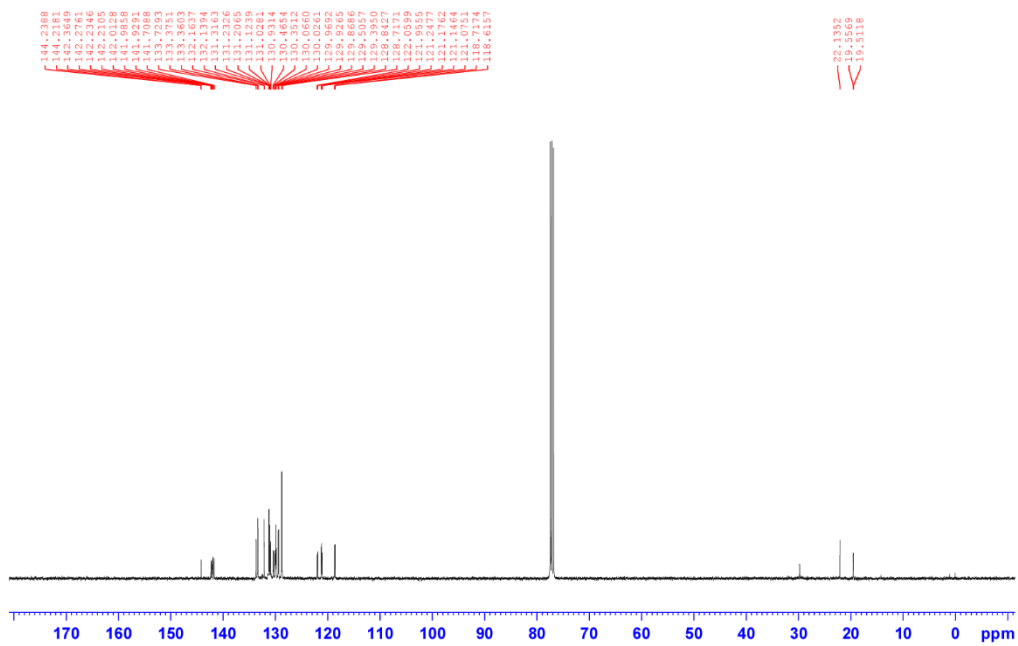

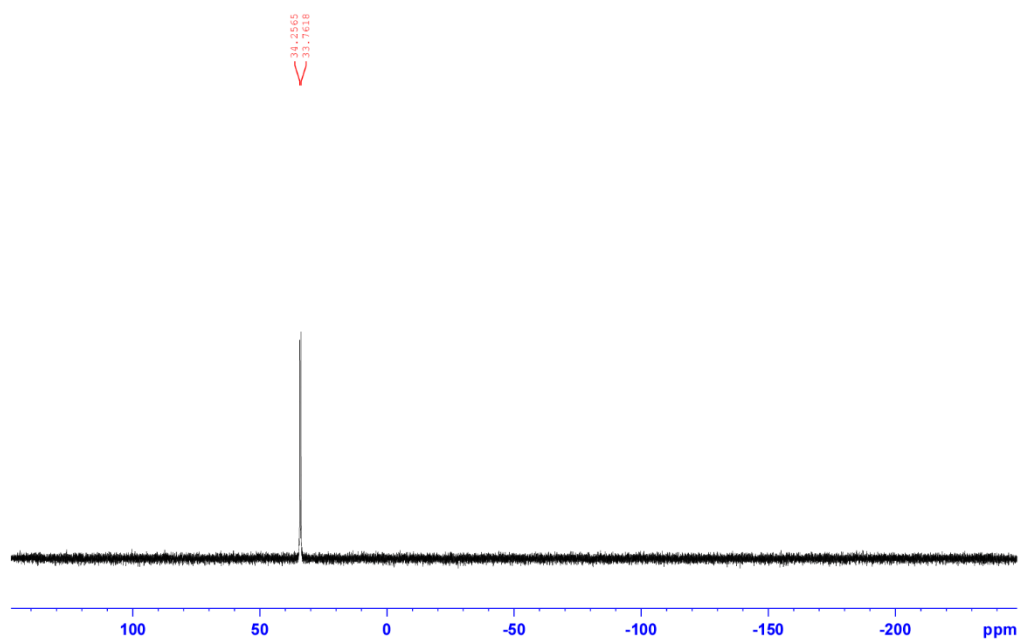

$[^1\text{H}, ^{13}\text{C}\{^1\text{H}\}, \text{ and } ^{31}\text{P}\{^1\text{H}\} \text{ NMR Spectra of } \mathbf{2I}]$ 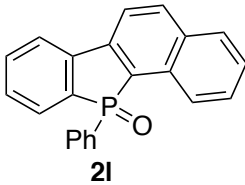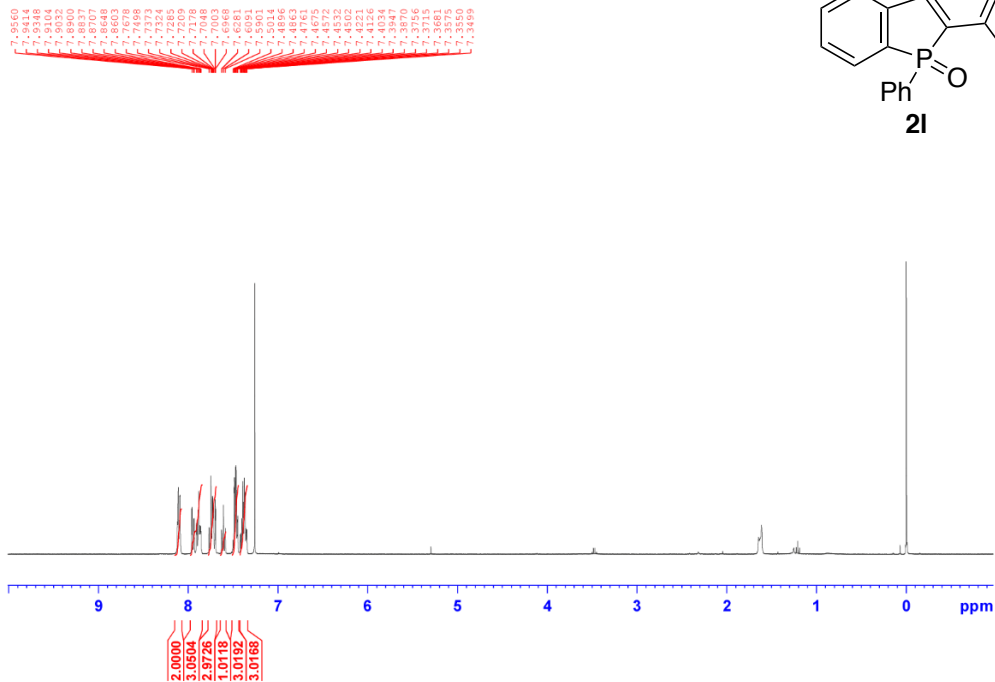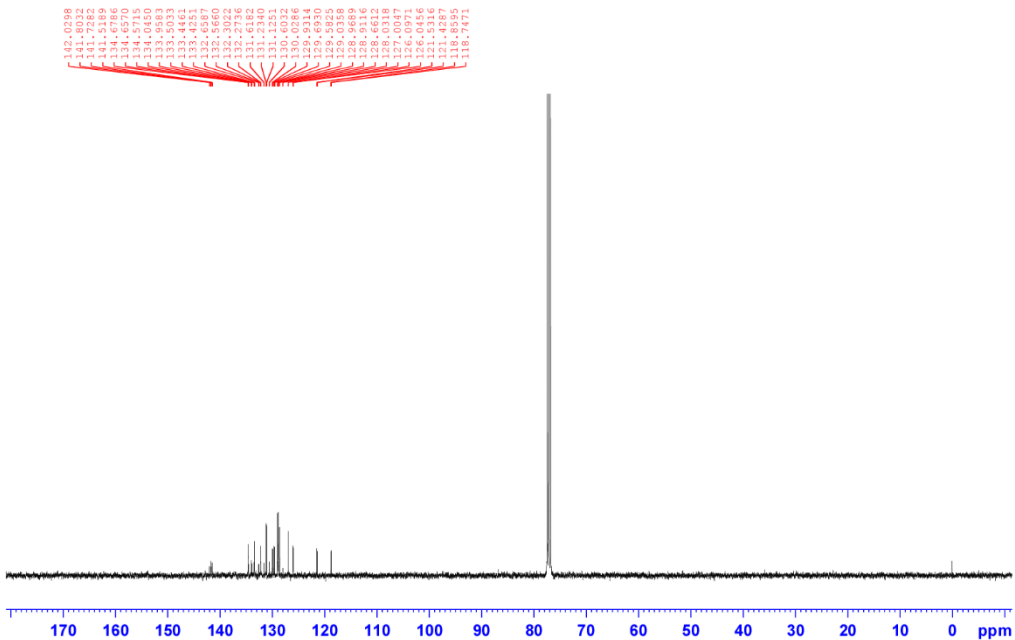

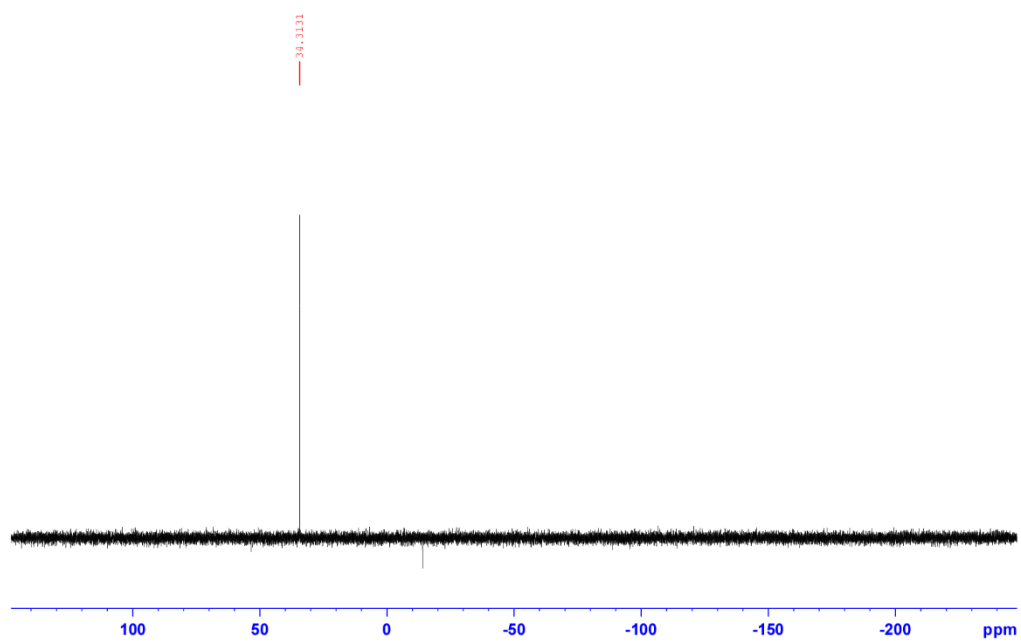

$[^1\text{H}, ^{13}\text{C}\{^1\text{H}\}, \text{ and } ^{31}\text{P}\{^1\text{H}\}] \text{ NMR Spectra of } \mathbf{2m}$

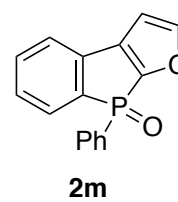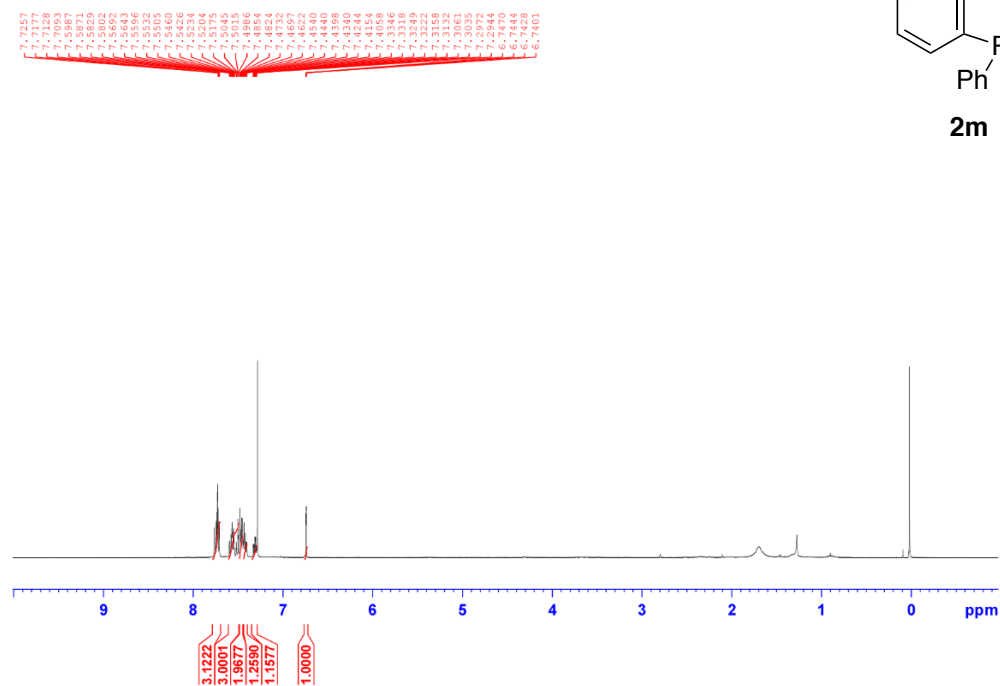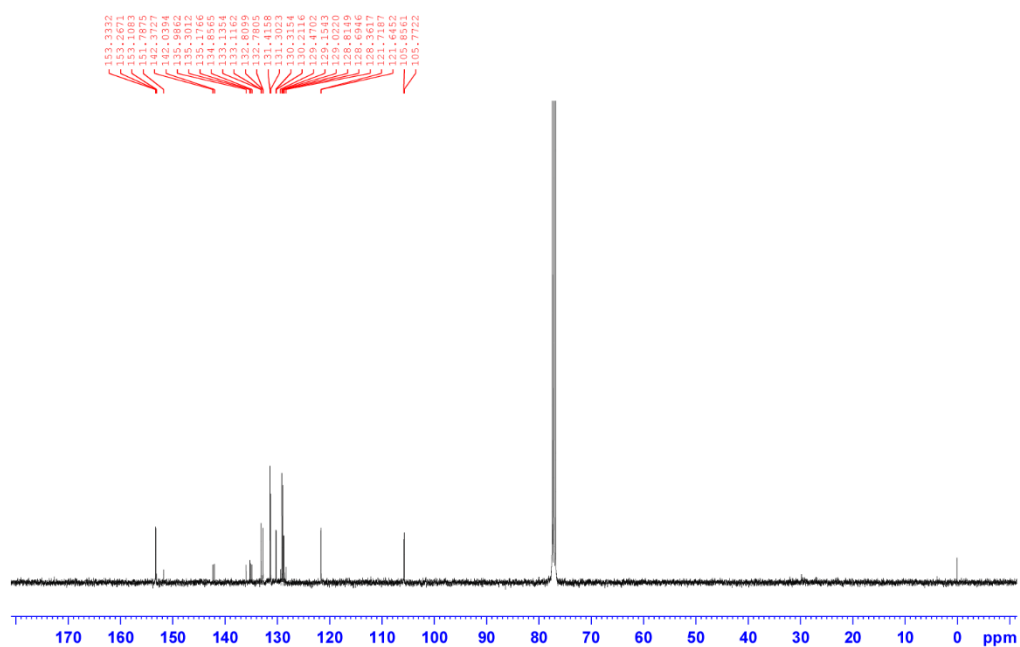



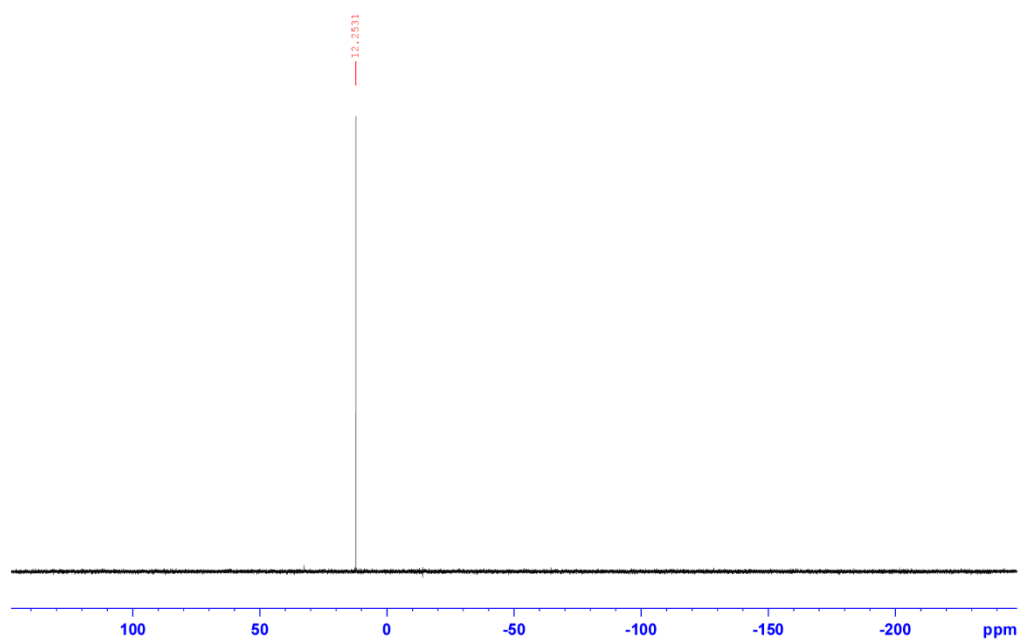

$[^1\text{H}, ^{13}\text{C}\{^1\text{H}\}, \text{ and } ^{31}\text{P}\{^1\text{H}\}]$  NMR Spectra of **2n**

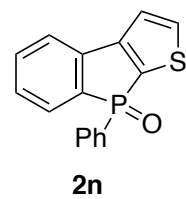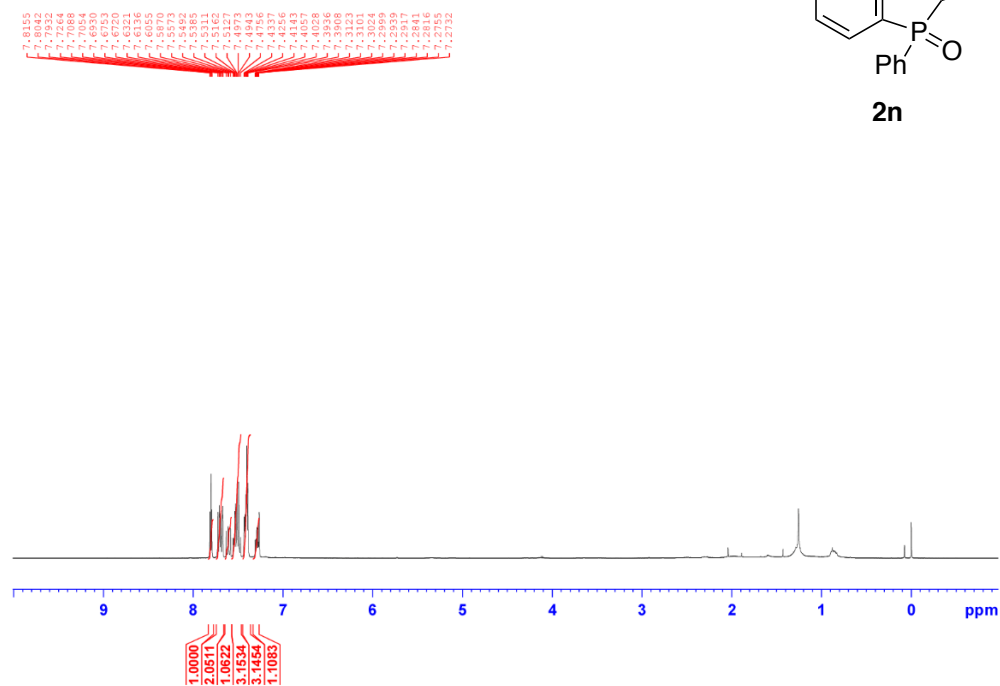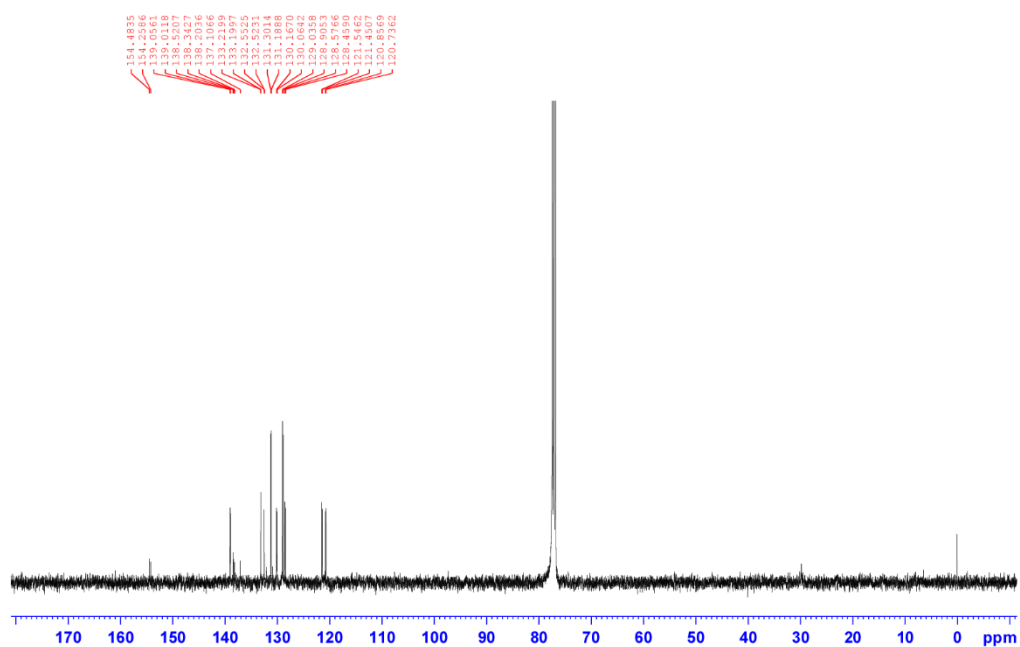

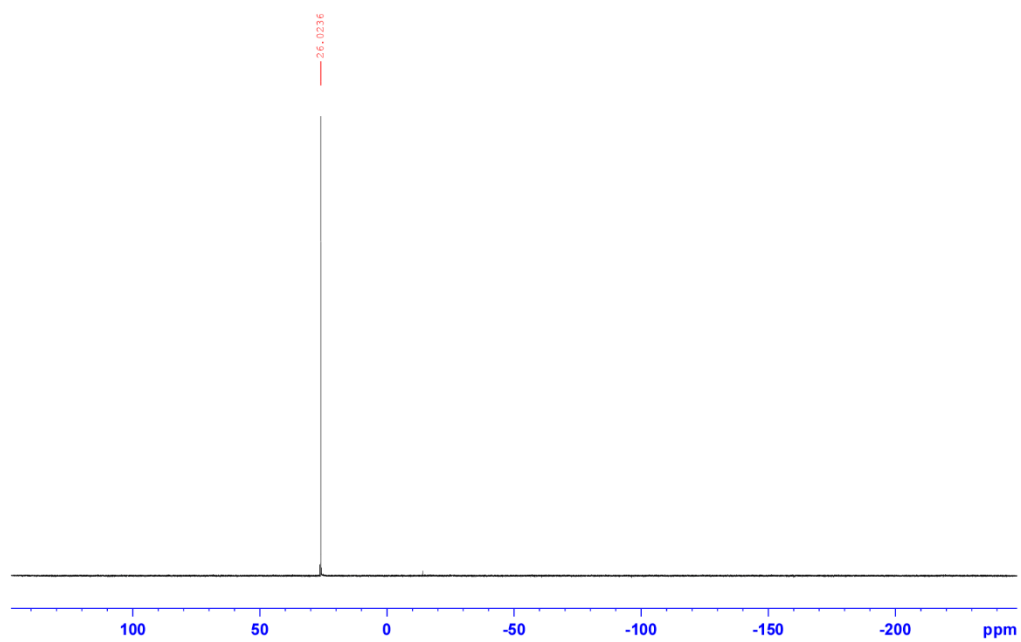

$[^1\text{H}$ ,  $^{13}\text{C}\{^1\text{H}\}$ , and  $^{31}\text{P}\{^1\text{H}\}$  NMR Spectra of **2o**]

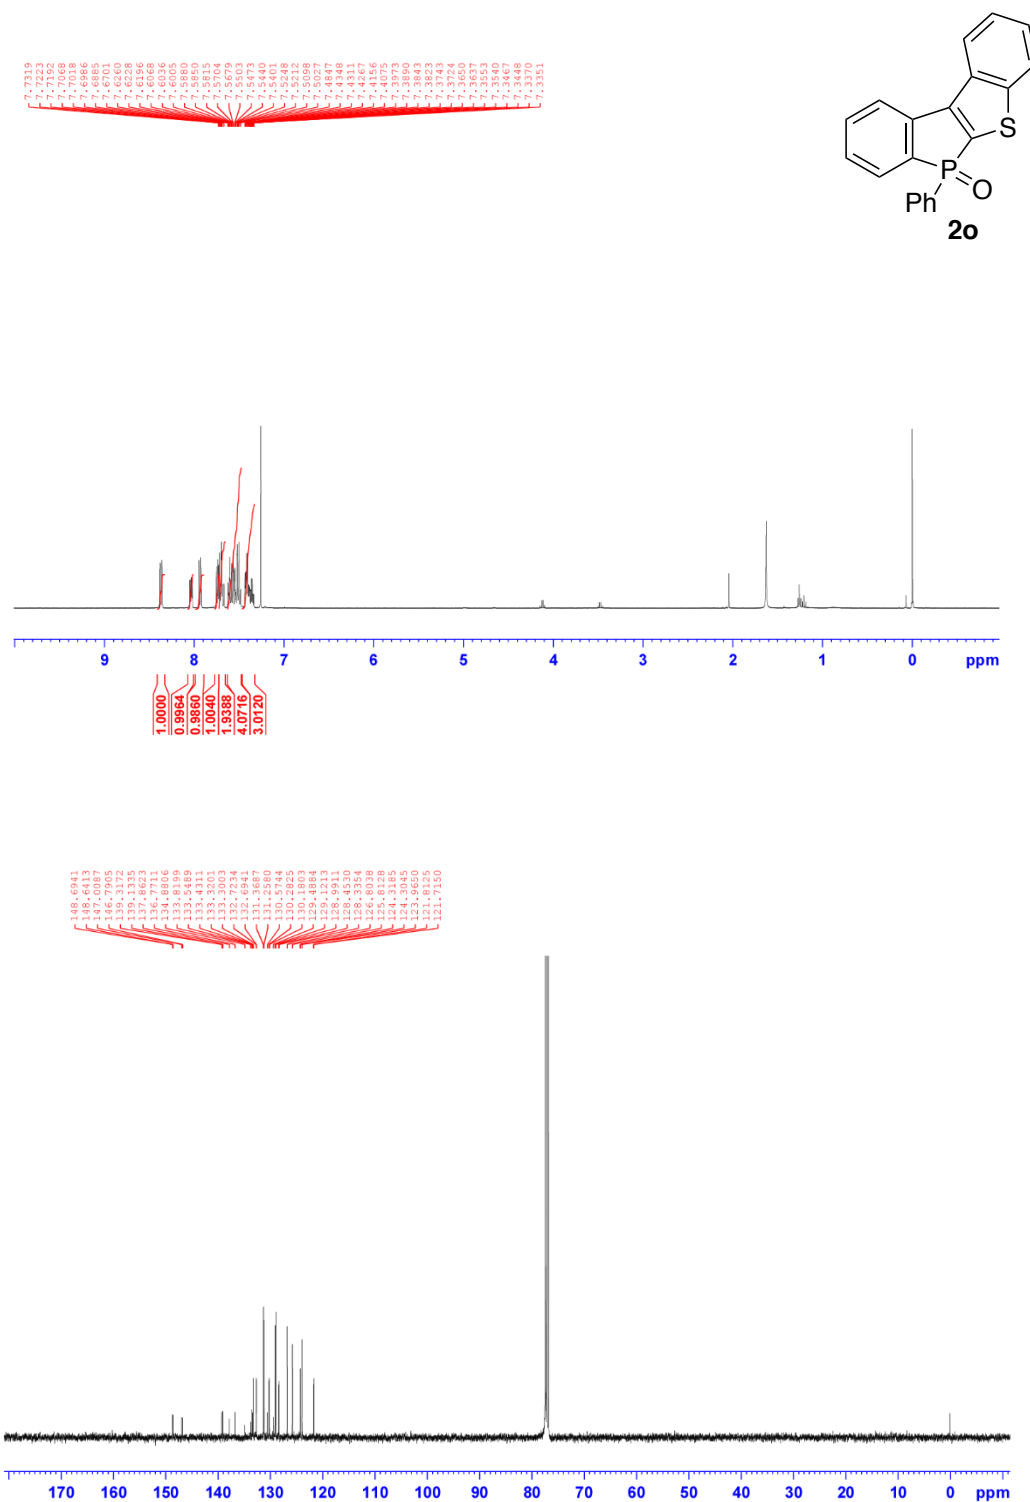

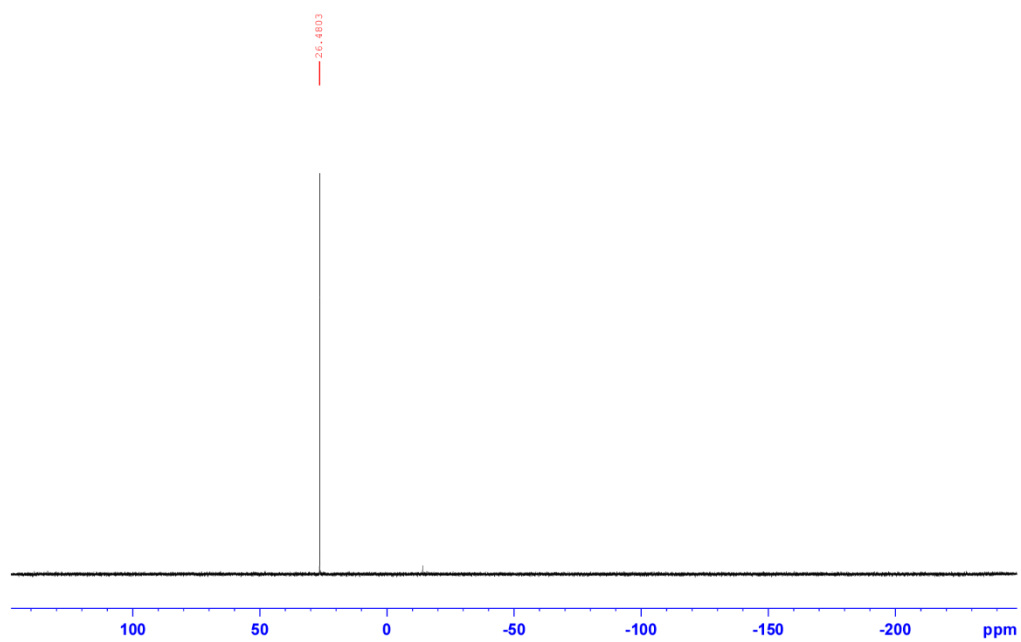

[ $^1\text{H}$ ,  $^{13}\text{C}\{^1\text{H}\}$ , and  $^{31}\text{P}\{^1\text{H}\}$  NMR Spectra of **2p**]

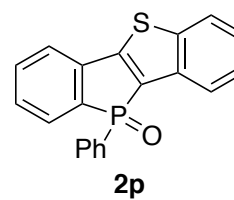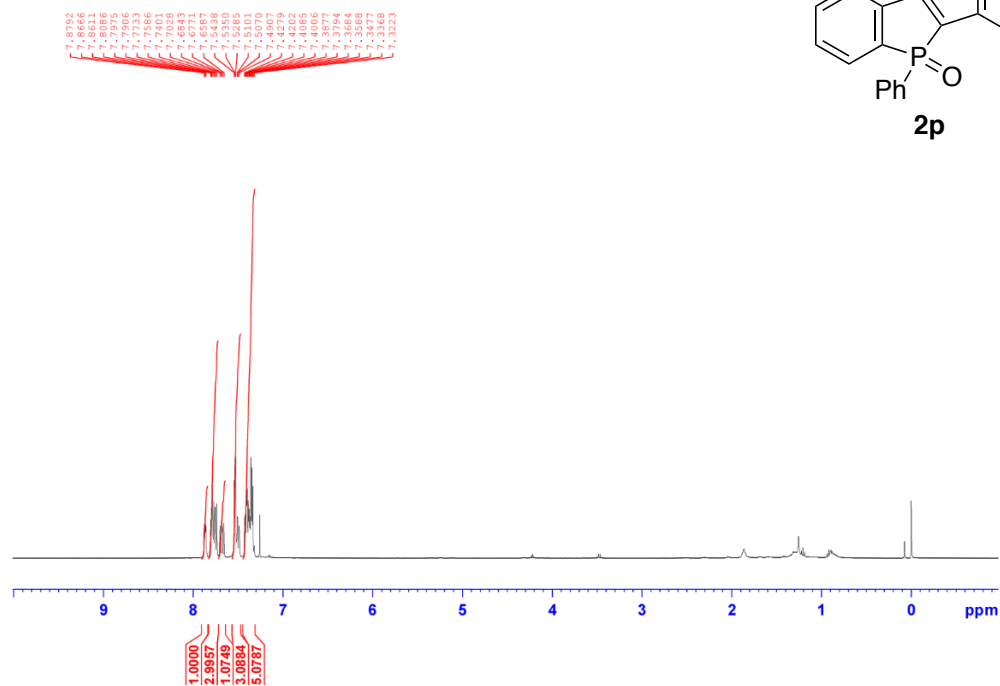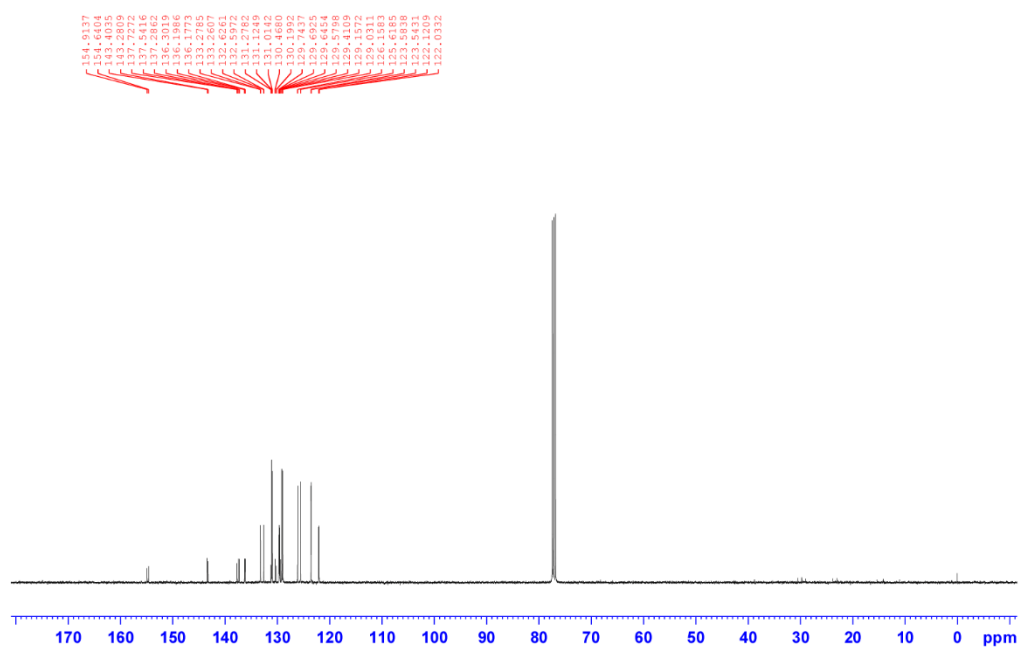

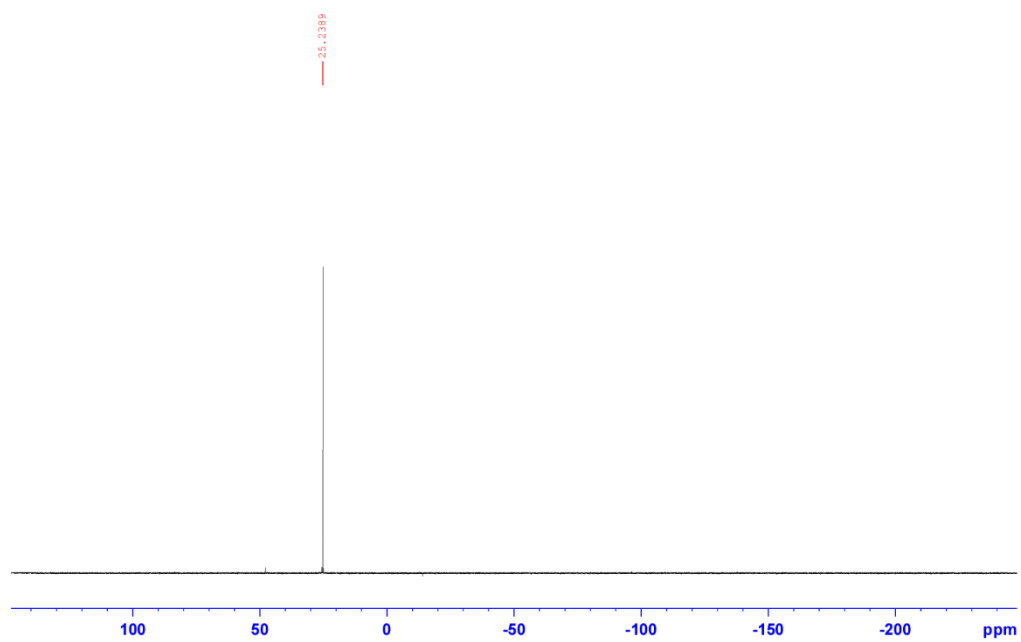

[ $^1\text{H}$  and  $^{31}\text{P}\{^1\text{H}\}$  NMR Spectra of **2q** + **2q'**]

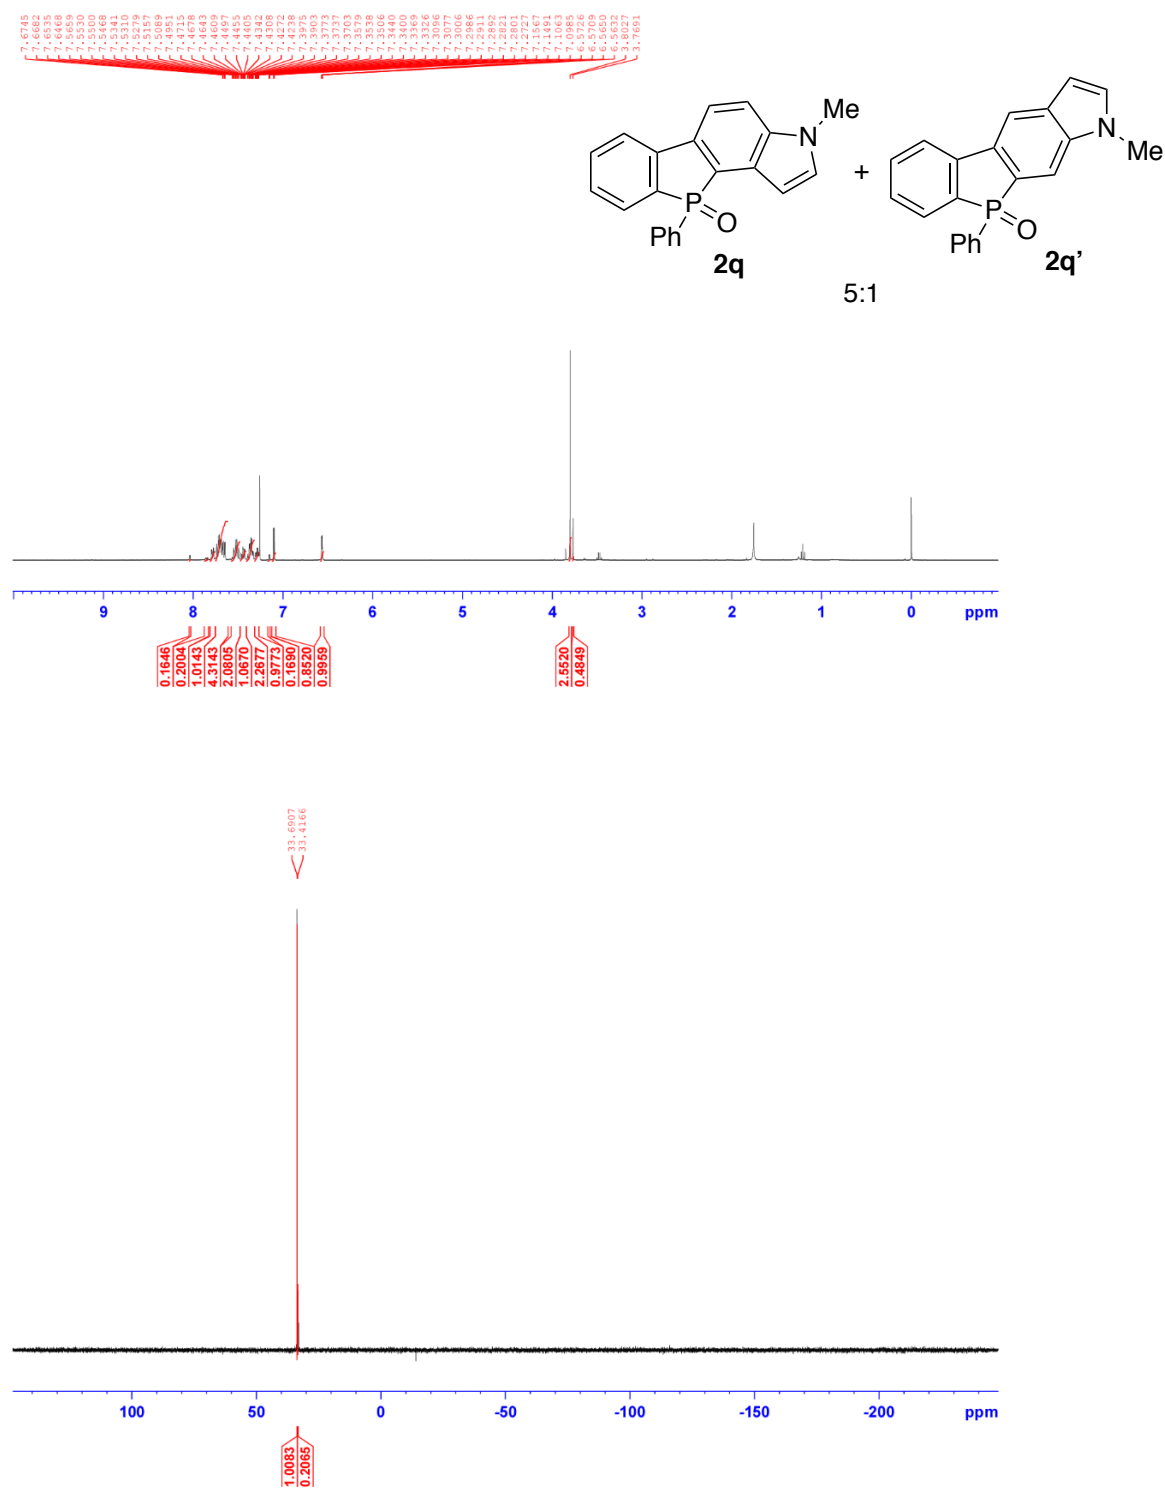



$[^1\text{H}, ^{13}\text{C}\{^1\text{H}\}, \text{ and } ^{31}\text{P}\{^1\text{H}\} \text{ NMR Spectra of } \mathbf{2q}]$ 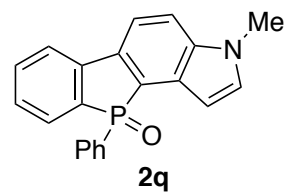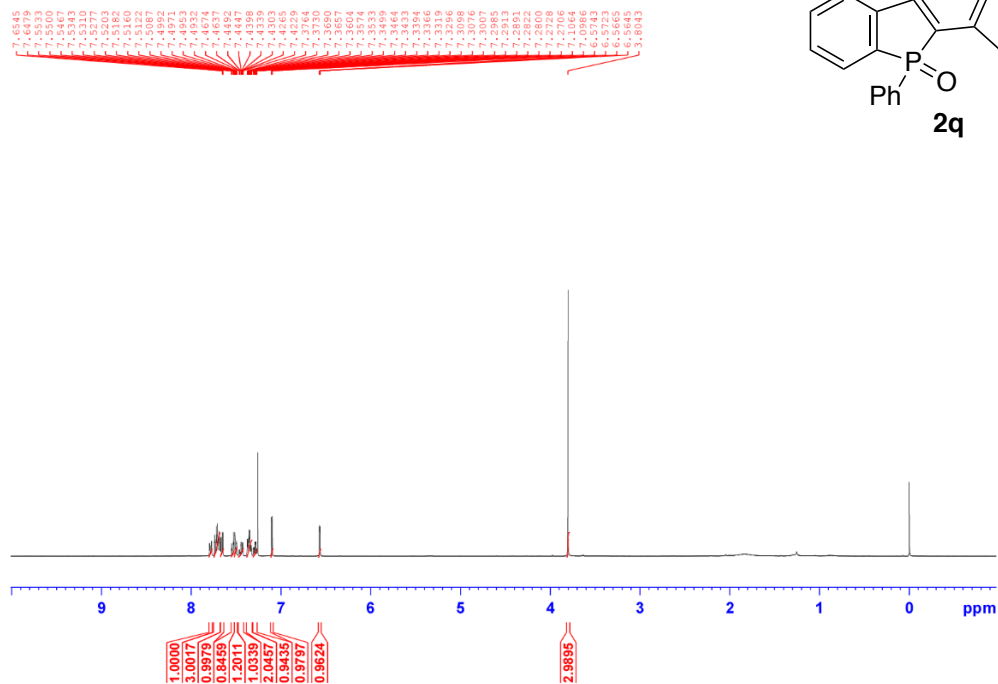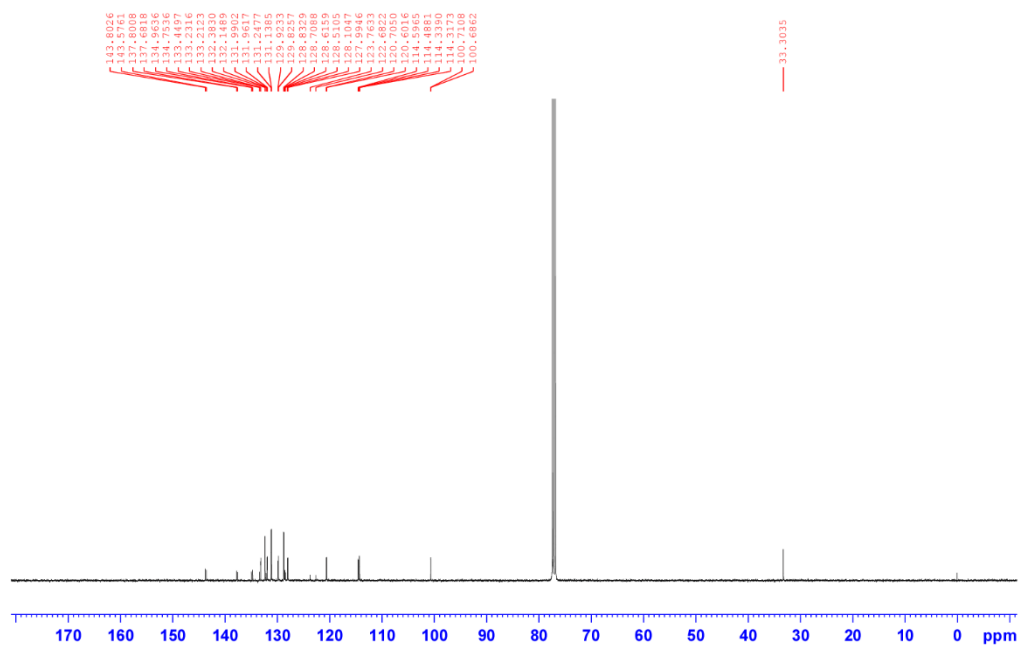

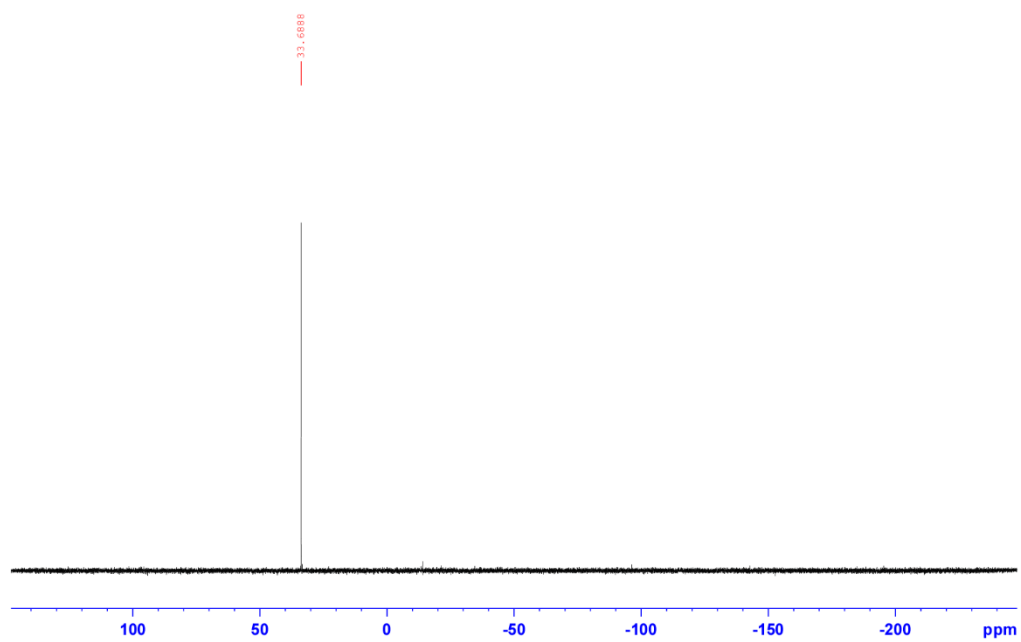

$^1\text{H}$ ,  $^{13}\text{C}\{^1\text{H}\}$ , and  $^{31}\text{P}\{^1\text{H}\}$  NMR Spectra of **2r**

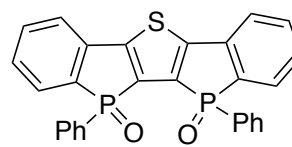

**2r** *syn/anti* = ca. 1:1

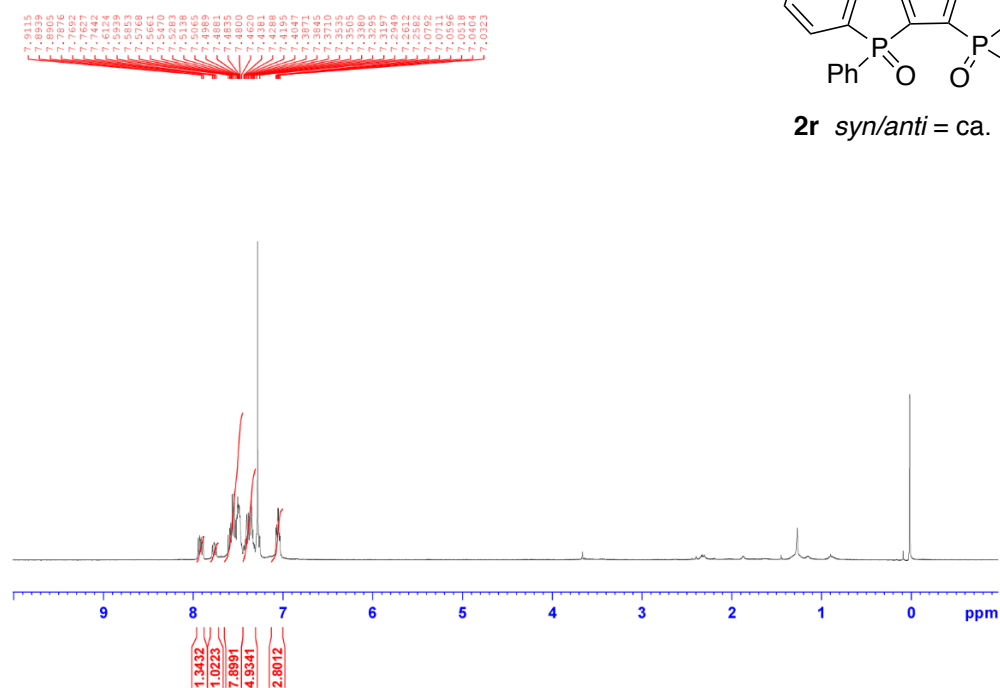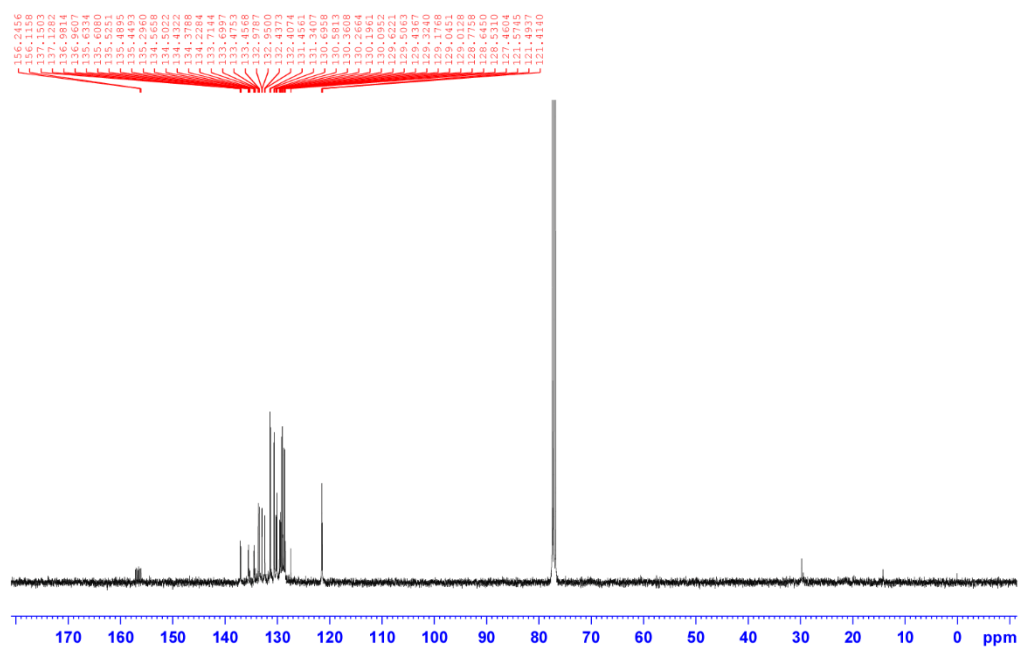

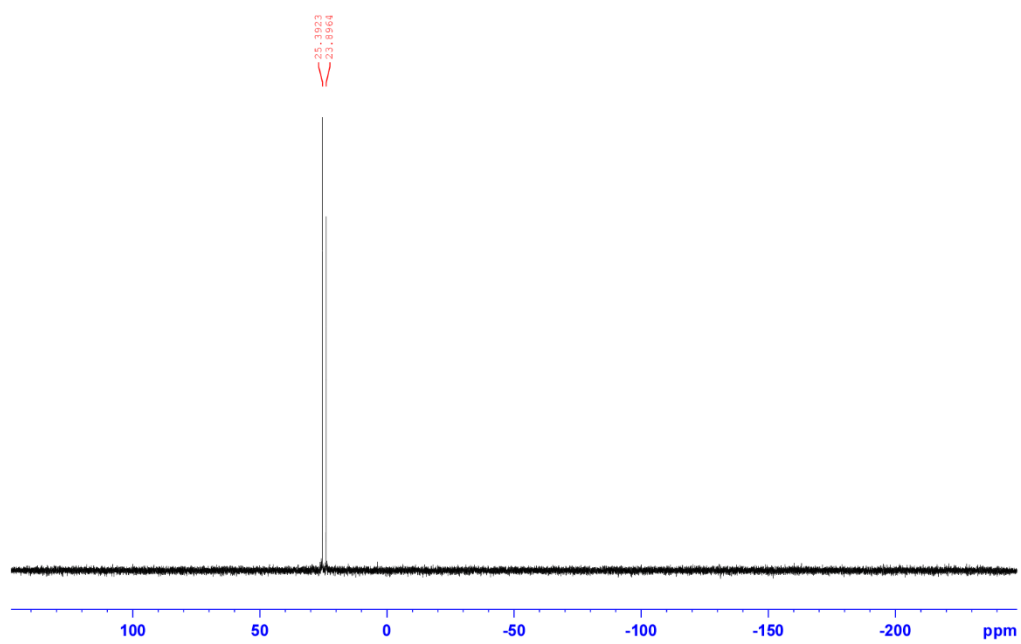

Supplement: Supplementary file 1 [file 14370587]
